# Supplementary material for: IGF1-mediated human embryonic stem cell self-renewal recapitulates the embryonic niche
Source: PubMed Central journal article supplement (PMC7005693; doi:10.1038/s41467-020-14629-x), 2020-02-07
Supplement: 41467_2020_14629_MOESM1_ESM.pdf [file 41467_2020_14629_MOESM1_ESM.pdf]

**Supplementary Information**

**IGF1-mediated human embryonic stem cell self-renewal recapitulates  
the embryonic niche**

Wamaitha et al.

Supplementary Figure 1

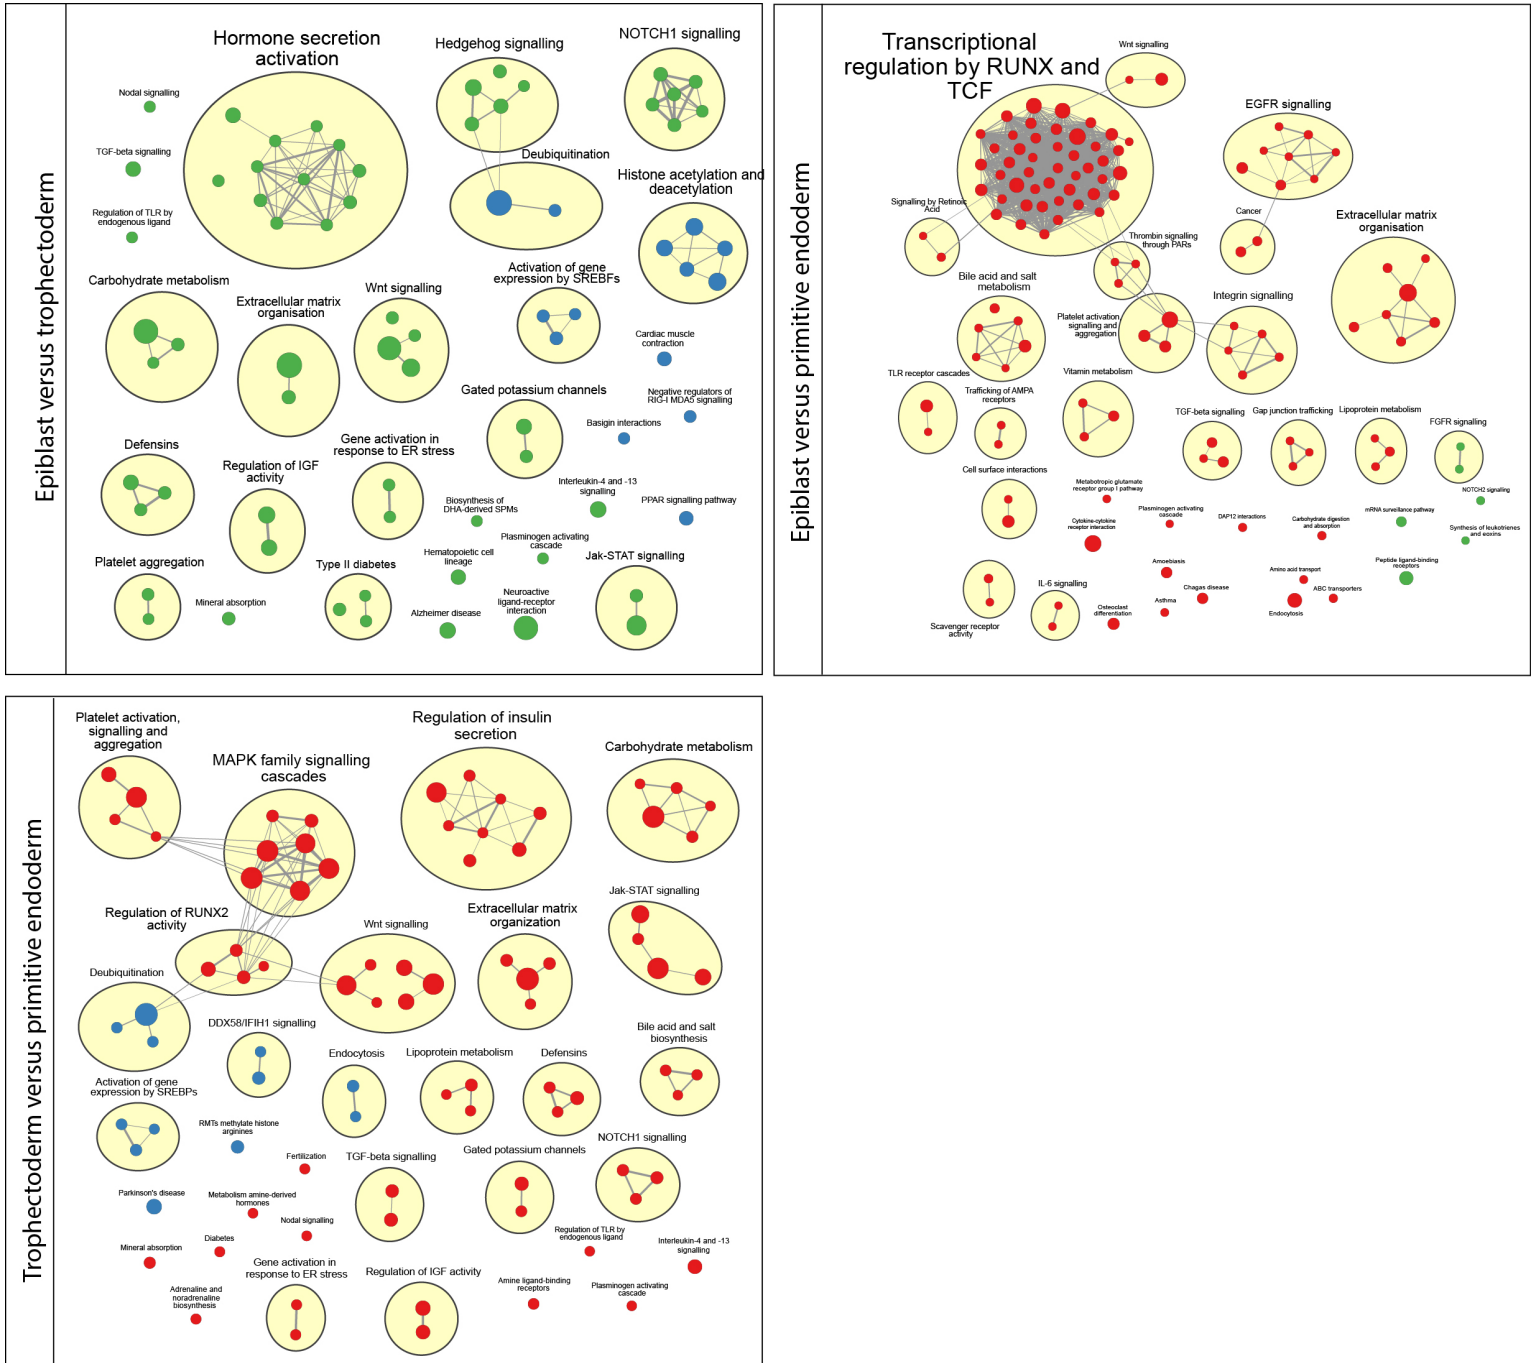

**Supplementary Figure 1: EnrichmentMap constructed in Cytoscape comparing human blastocyst lineages following gene set enrichment analysis (P-value <0.01). Gene sets enriched in the Epi, PE or TE are coloured green, red or blue respectively.**

## Supplementary Figure 2

### Signalling in the human early embryo

This Shiny App colours genes on KEGG pathway diagrams according to their expression in the different cell types of the human blastocyst. Signal transduction pathways can be chosen from the dropdown menu on the left and blastocyst cell types from the one on the right. Epi corresponds to the epiblast, PE to the primitive endoderm and TE to the trophoctoderm. Gene expression is shown as a colour range in  $\log_2(\text{RPKM} + 1)$  units and corresponds to single-cell RNA-seq data from Yan et al. and Blakeley et al. As a result, rectangles on the KEGG diagram are coloured with the median expression of the gene across single cells of the same type. When rectangles represent more than one gene, the maximum median is represented. Clicking on a rectangle generates boxplots with the expression distribution of the gene or genes in the three blastocyst cell types.

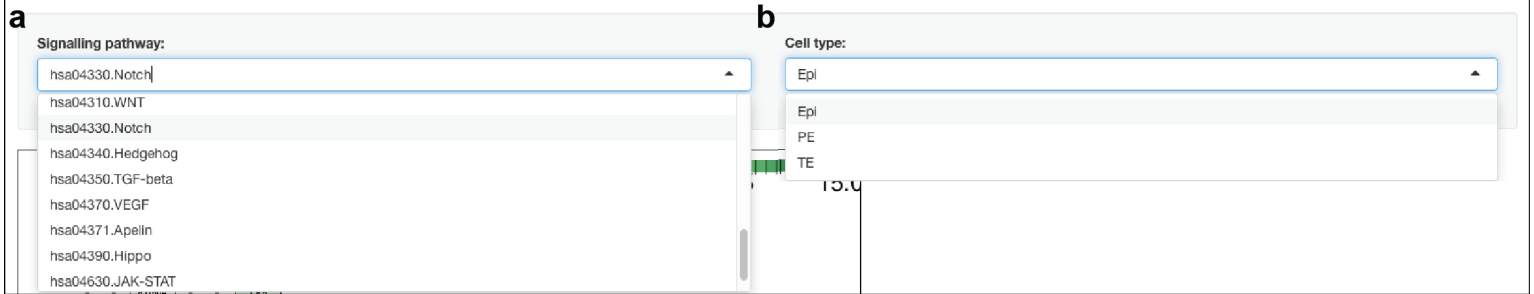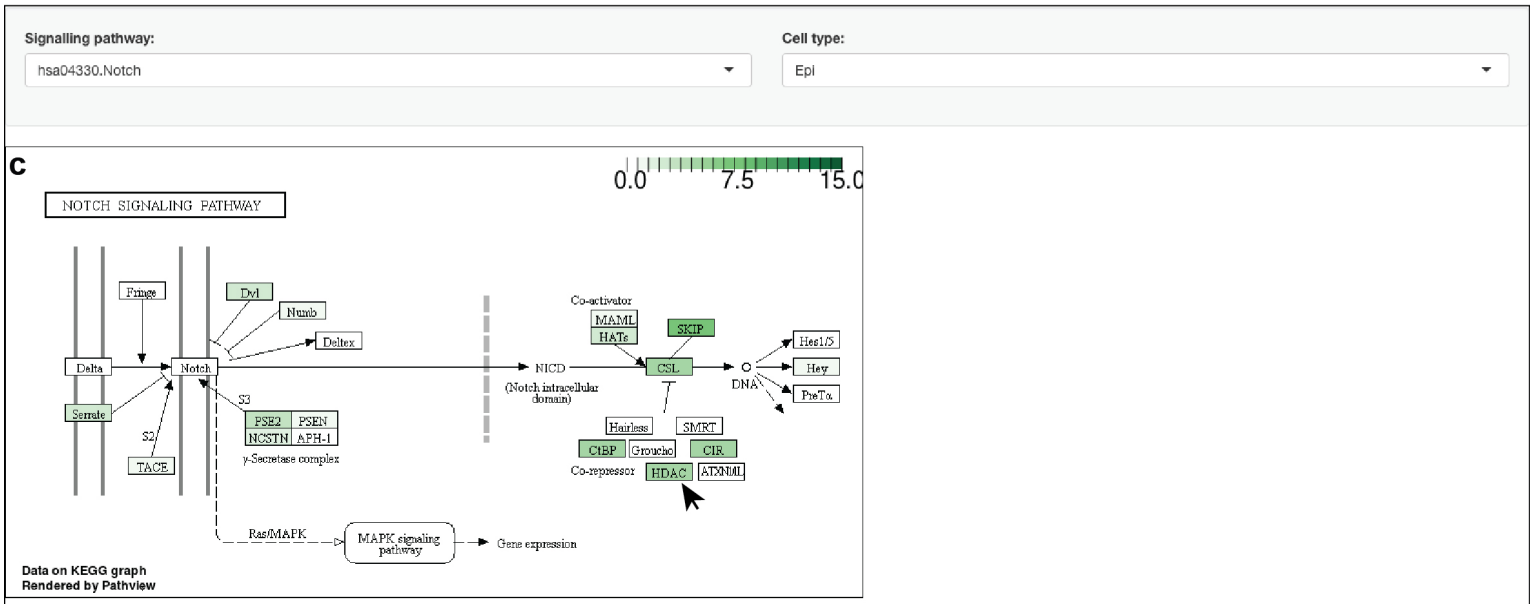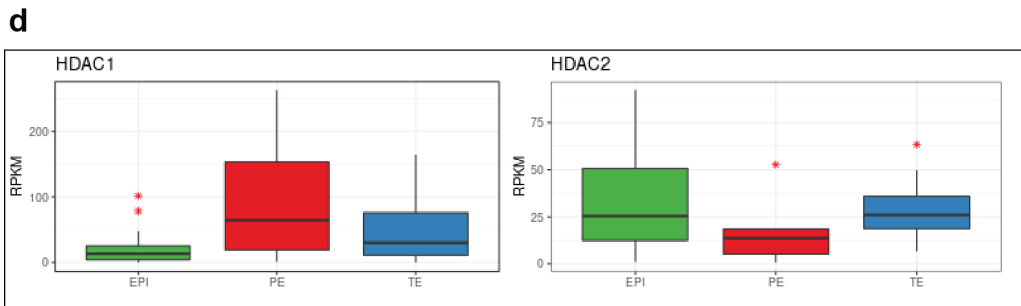

**Supplementary Figure 2: An example of the website developed to search gene expression in the human blastocyst in the context of KEGG signal transduction pathways.** Overview of the web tool user interface. **(a)** The ‘Signalling pathway’ dropdown menu on the left lists all the signal transduction pathways from the KEGG database. **(b)** The ‘Cell type’ menu on the right lists the three different cell types of the human early blastocyst (epiblast or Epi, primitive endoderm or PE, and trophoctoderm or TE). **(c)** In this example, the NOTCH signalling pathway in the EPI lineage was selected. The graphic shows the level of expression of the NOTCH pathway members in the given lineage (EPI), with a colour-coded heat map in the top right. **(d)** Clicking on a specific pathway member (in this case *HDAC*) generates a boxplot showing the expression of the selected gene or genes (if the pathway member represents a gene category) in the three embryonic cell types. Boxes symbolise first and third quartiles, horizontal lines the median, whiskers extend to 1.5 times the interquartile range and the dots represent outliers. Web page can be accessed at: [https://shiny.crick.ac.uk/embryo\\_signalling/](https://shiny.crick.ac.uk/embryo_signalling/)

### Supplementary Figure 3

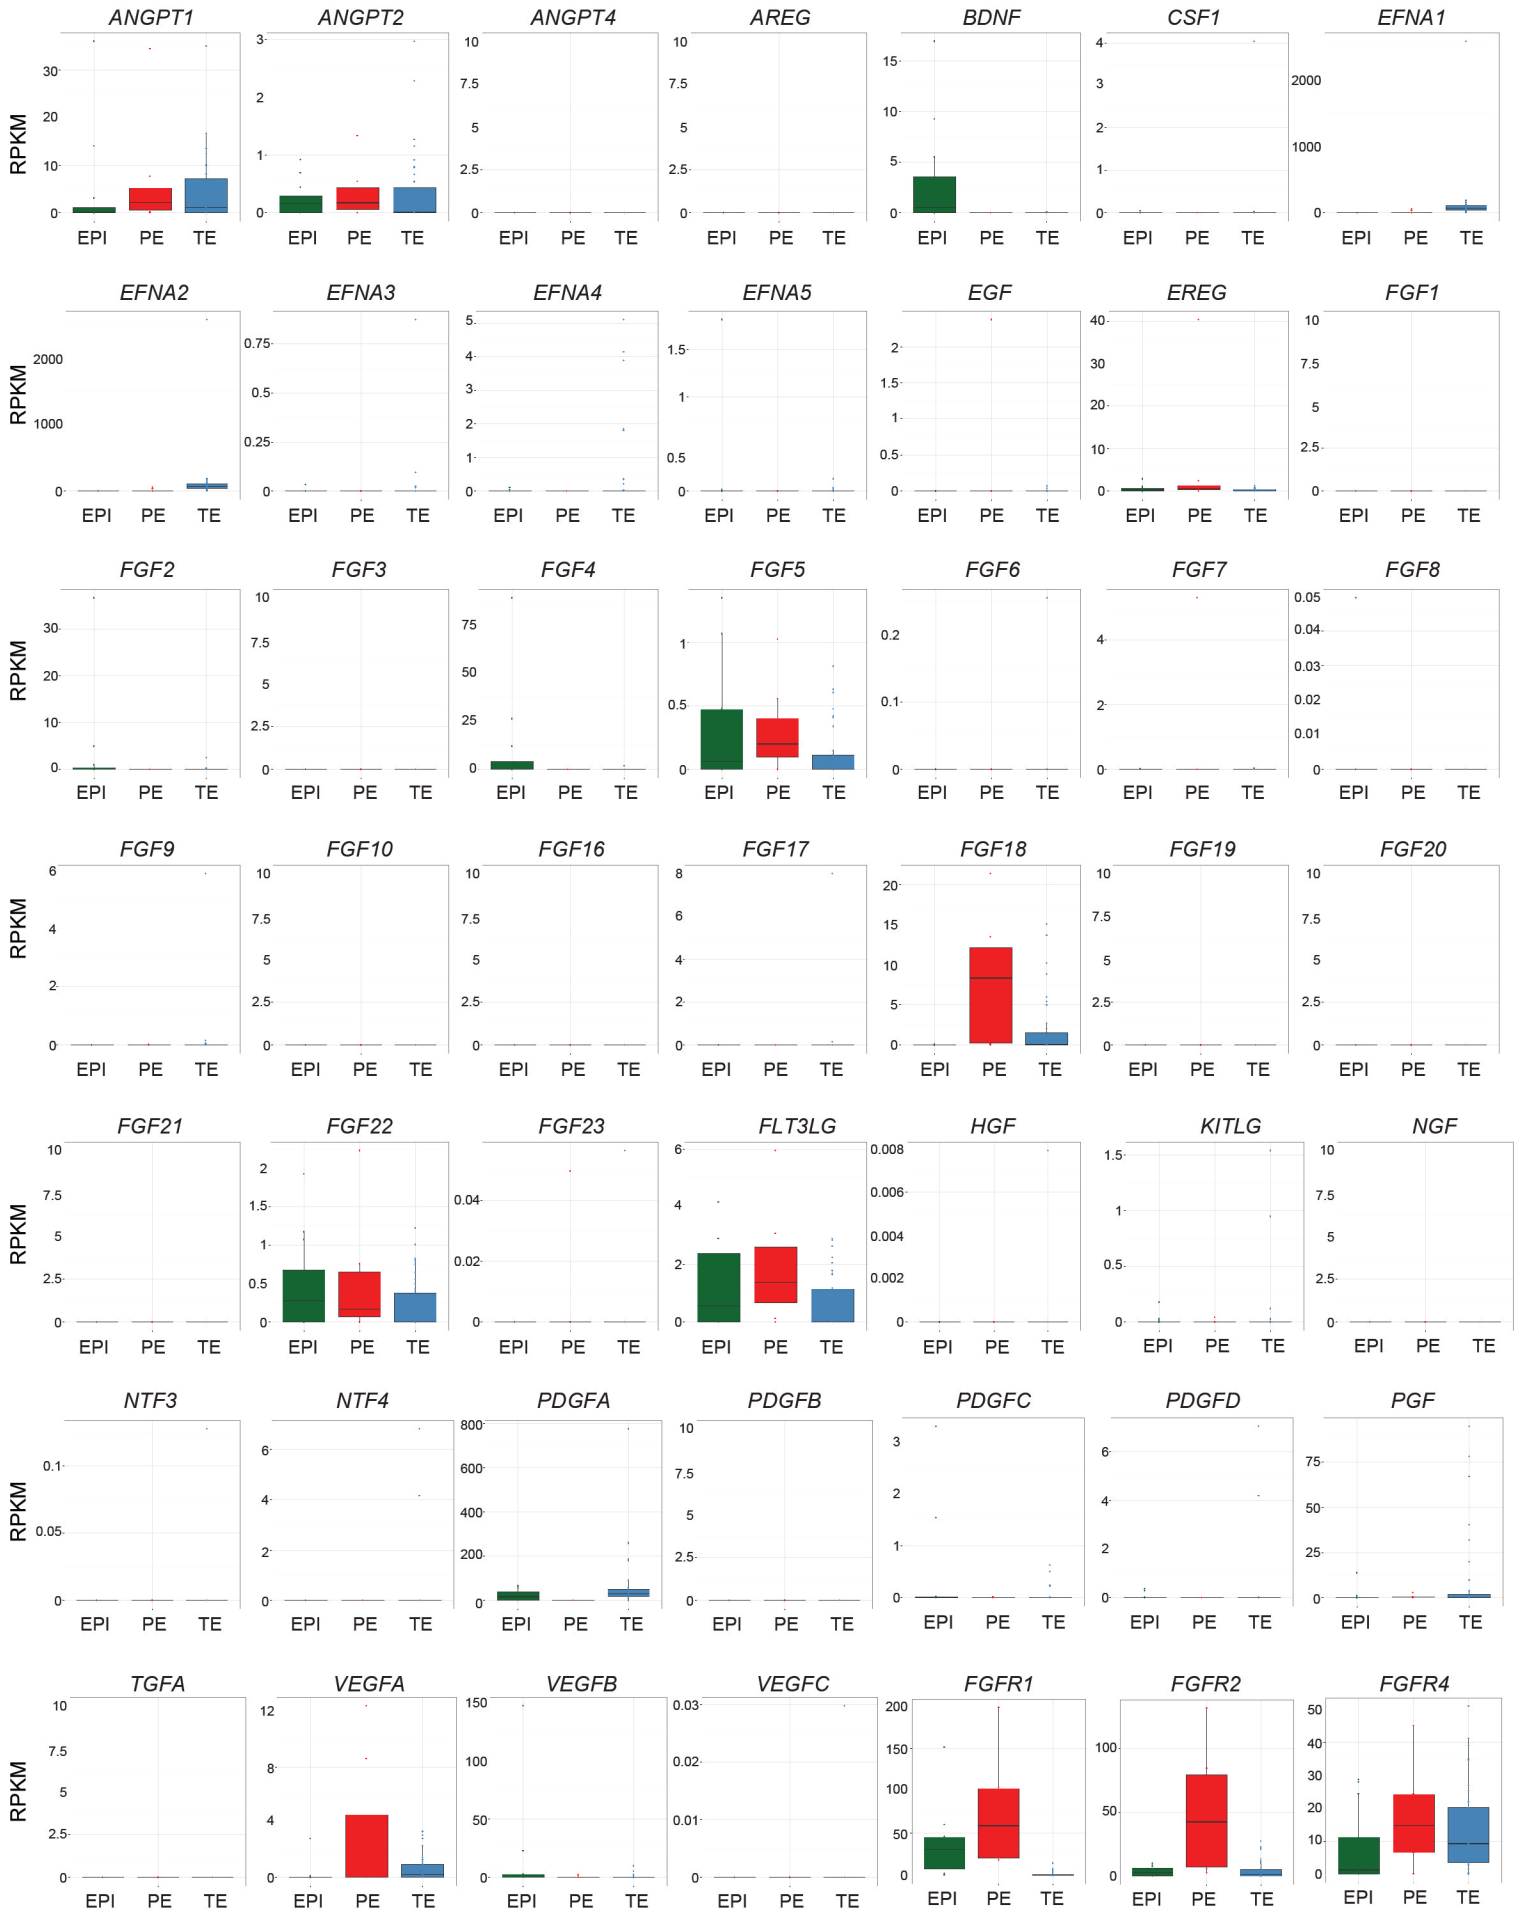

**Supplementary Figure 3: Boxplot of RPKM values for MAPK ligands and selected FGF receptors in human preimplantation embryos.** Trophectoderm (TE, blue); epiblast (EPI, green) and primitive endoderm (PE, red) expression is shown. Boxes symbolise first and third quartiles, horizontal lines the median, whiskers extend to 1.5 times the interquartile range and dots represent outliers.

## Supplementary Figure 4

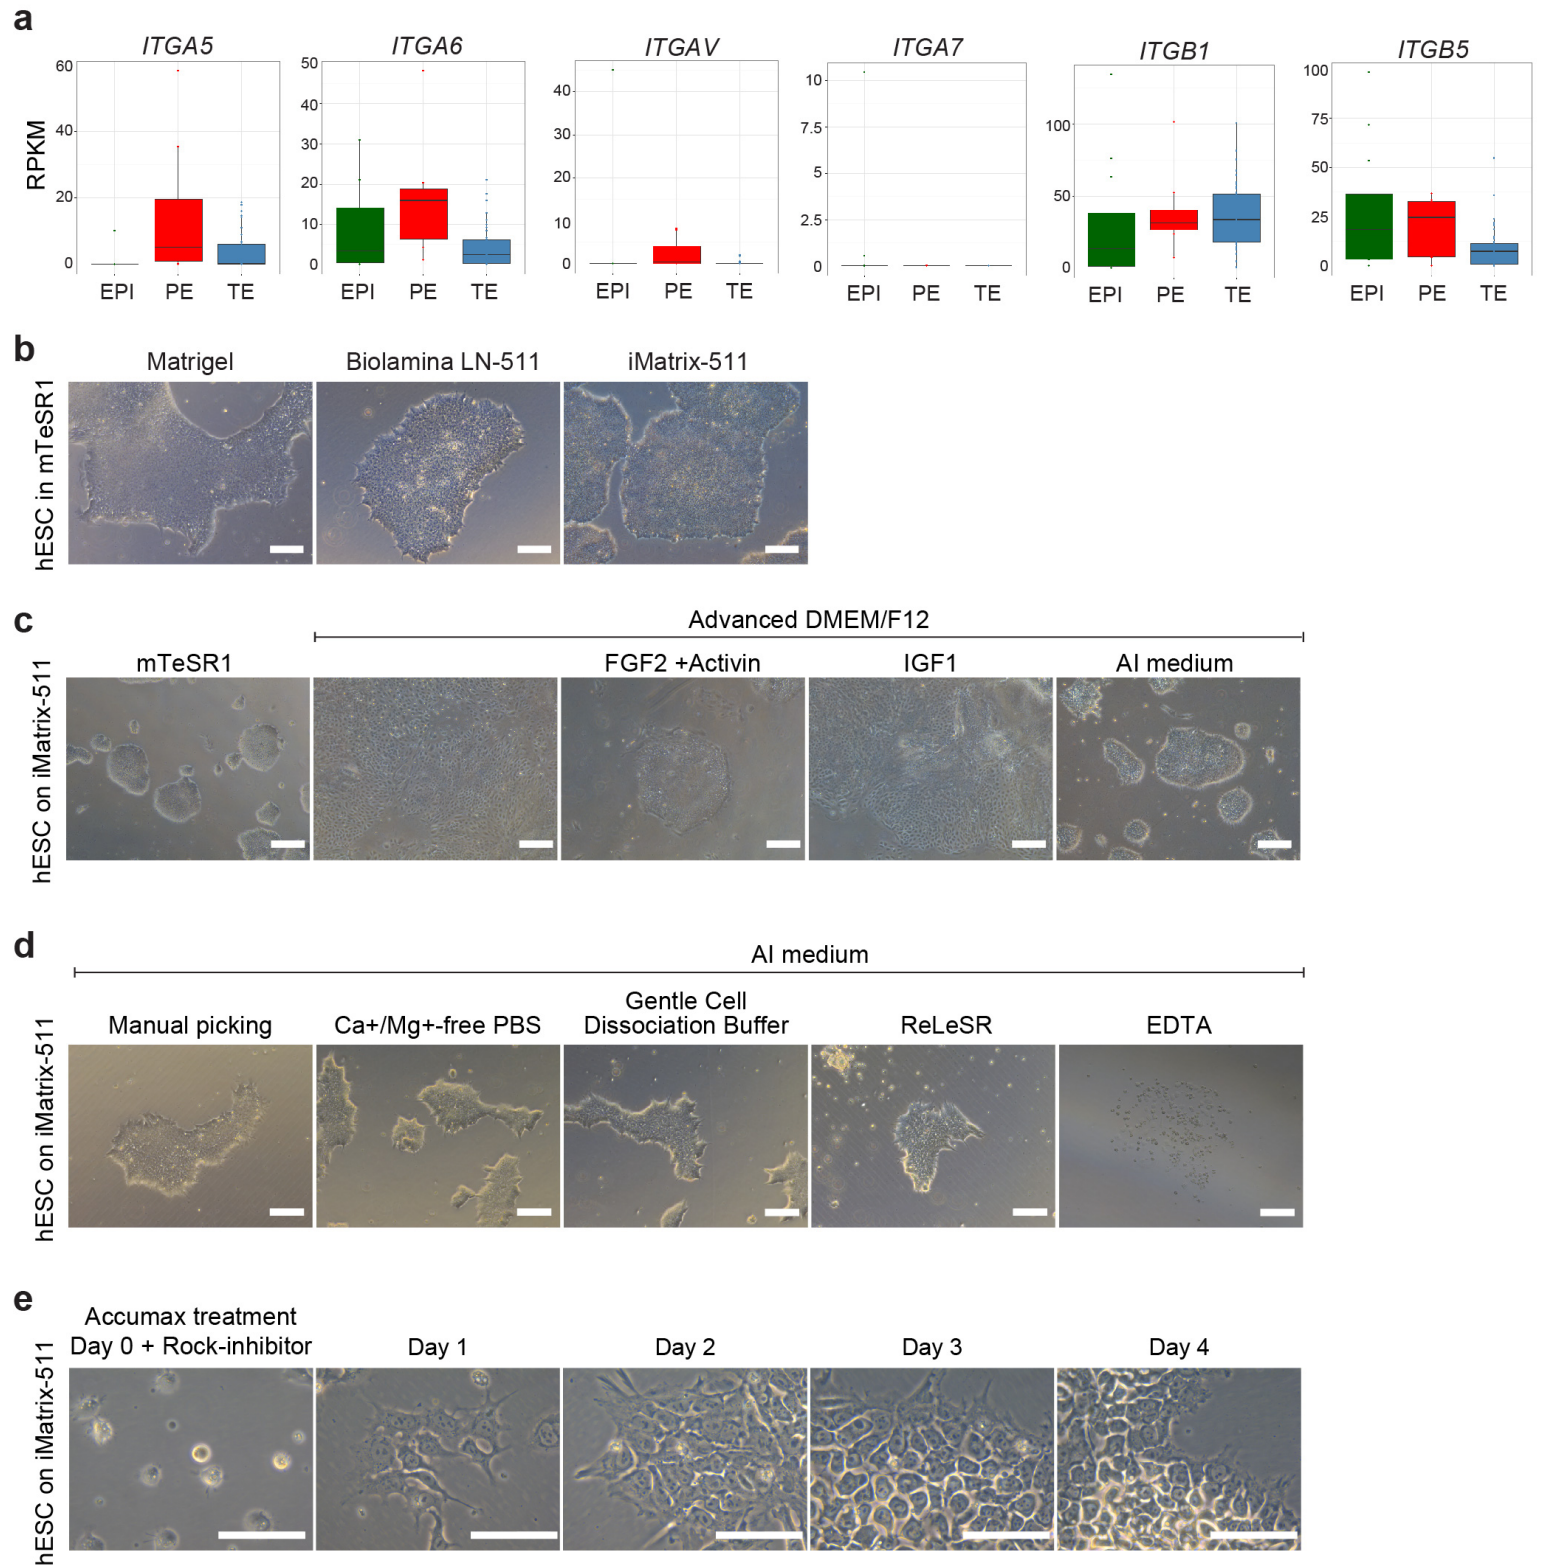



**Supplementary Figure 4: Establishing Activin and IGF1 (AI) hESC culture medium.** (a) Boxplots of reads per kilobase of million mapped reads (RPKM) values for integrin subunits (*ITGA5*, *ITGA6*, *ITGA7*, *ITGAV*, *ITGB1*, *ITGB5*) in human blastocyst lineages (EPI green, PE red, TE blue) as determined by single cell RNA-seq<sup>1</sup>. Boxes symbolize first and third quartiles, horizontal lines the median, whiskers extend to 1.5 times the interquartile range and dots represent outliers. (b) Representative phase-contrast images of mTeSR1-cultured hESCs on Matrigel, Biolamina LN-511 and iMatrix-511 (Takara). Scale bar: 300  $\mu\text{m}$ .  $n = 2$  biological replicates. (c) Representative phase-contrast images of hESCs grown for two passages on Laminin-511 (iMatrix-511) in control mTeSR1 medium, basal medium (Advanced-DMEM/F12 plus 2 mM glutamine supplement) alone, or basal medium supplemented with 10 ng/ml Activin and 12 ng/ml FGF2; 17 nM IGF1; or 10 ng/ml Activin and 17 nM IGF1 (AI medium).  $n = 2$  biological and 2 technical replicates. Scale bar: 300  $\mu\text{m}$ . (d) Representative images of AI-adapted hESCs, 2 days after passage either manually, or with various dissociation reagents -  $\text{Ca}^+/\text{Mg}^+$ -free PBS, Gentle Cell Dissociation Reagent, ReLeSR or 0.5 mM EDTA.  $n = 2$  or 3 technical replicates. Scale bar: 300  $\mu\text{m}$ . (e) Representative images of hESCs dissociated with Accumax to single-cells in the presence of a Rho-associated kinase (ROCK) inhibitor and their subsequent growth.  $n = 3$  biological and 3 technical replicates. Scale bar: 100  $\mu\text{m}$ .

# Supplementary Figure 5

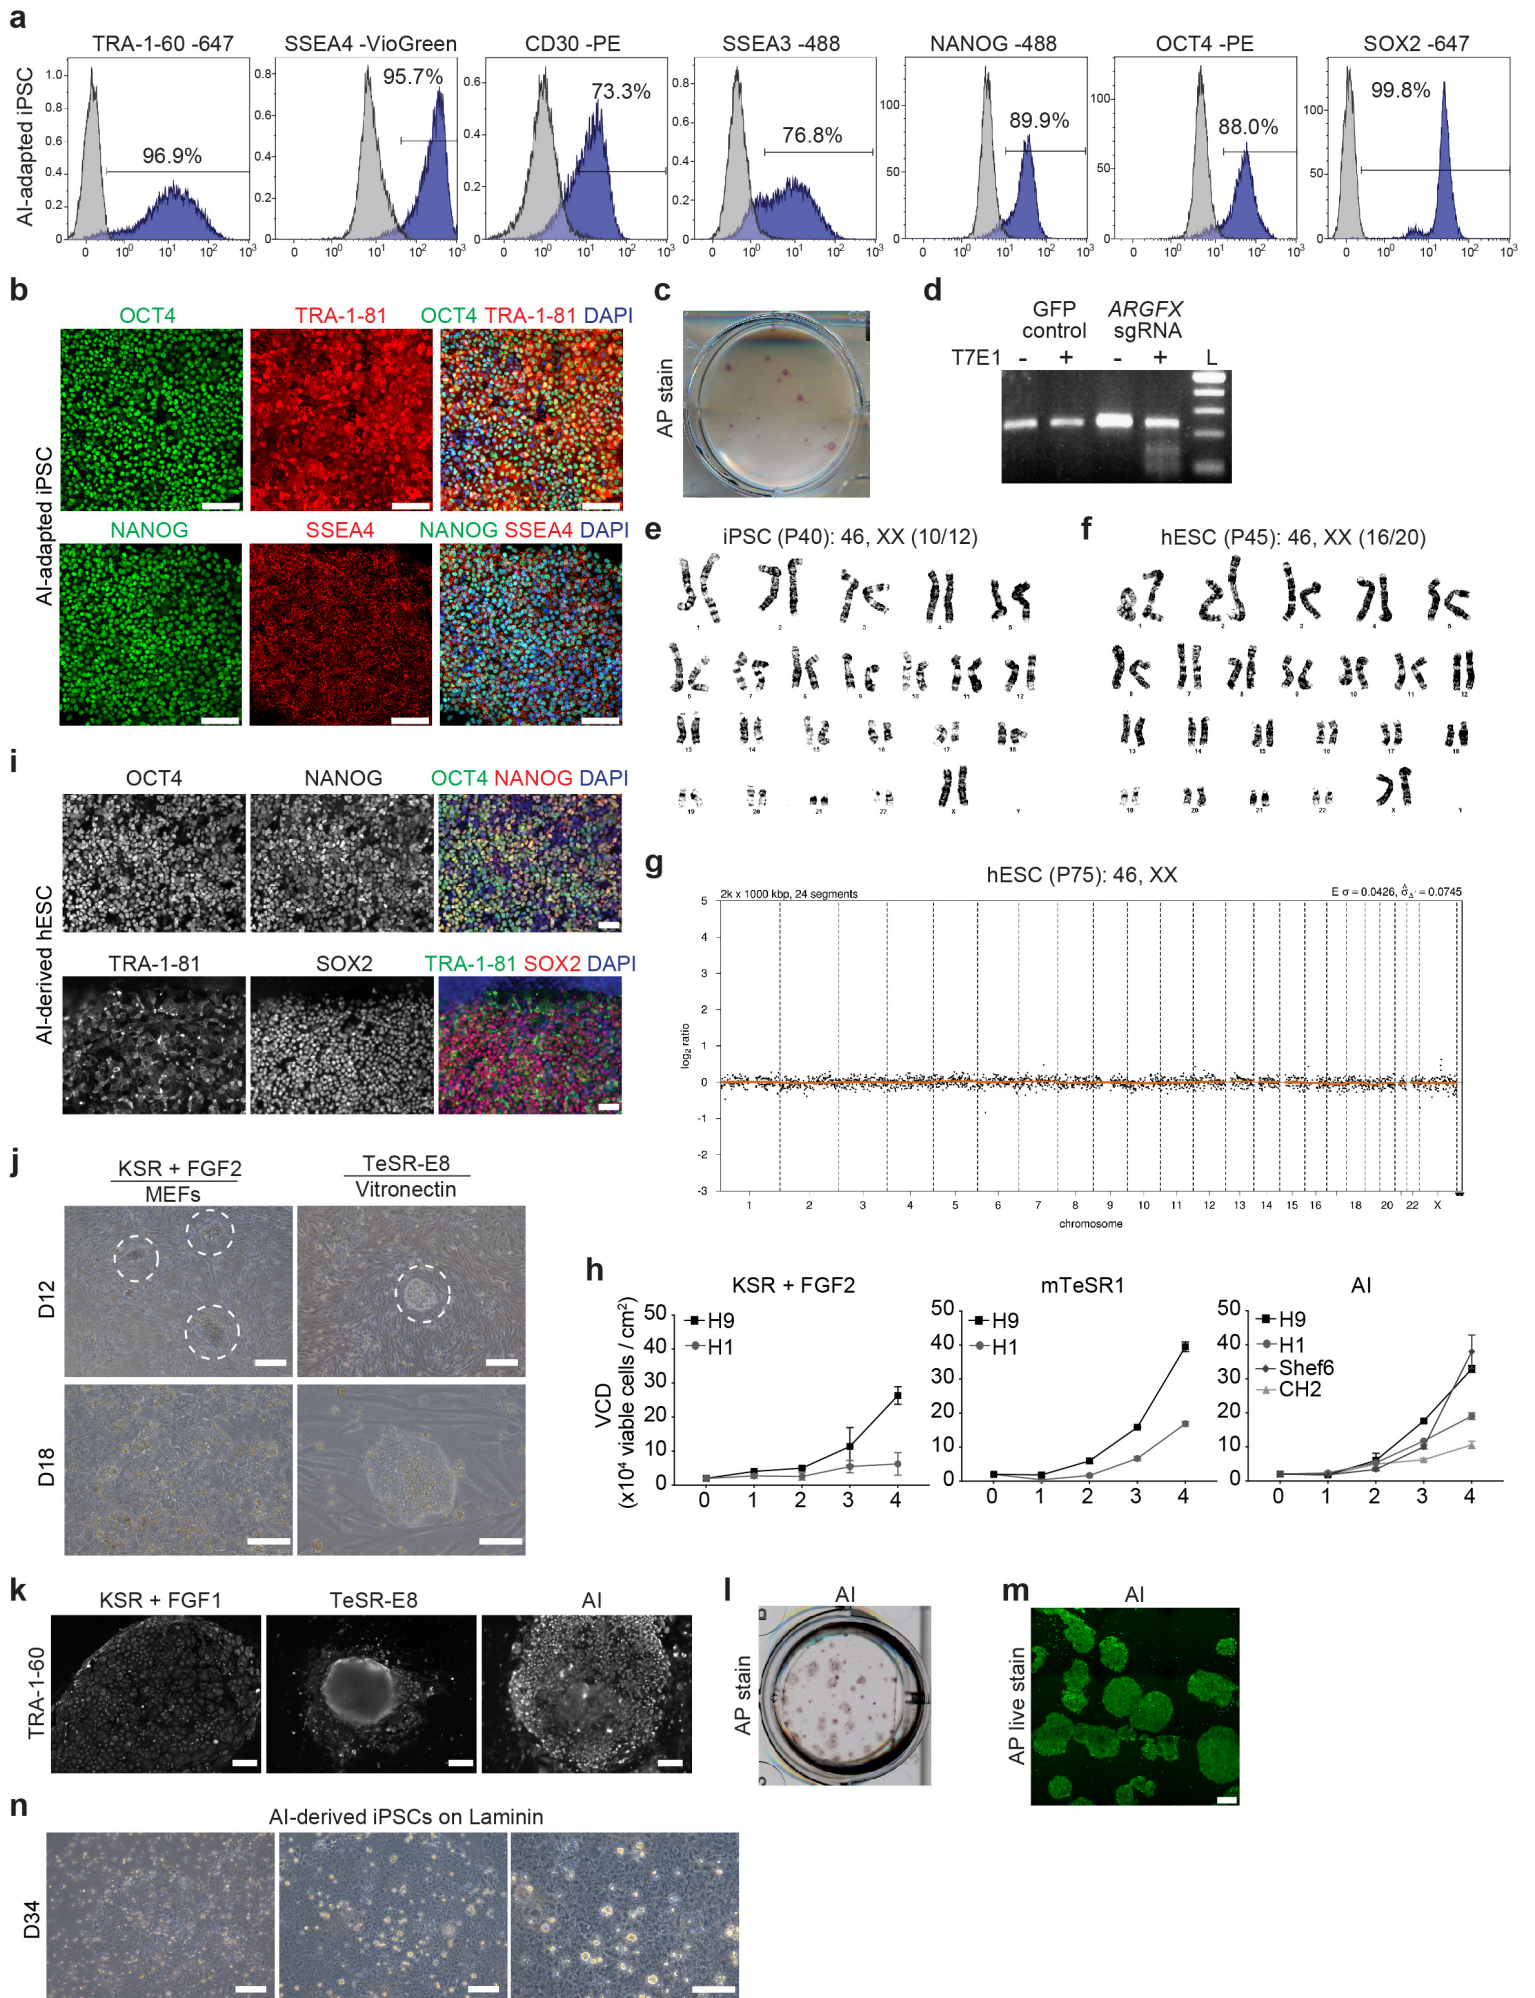

**Supplementary Figure 5: Characterizing AI-adapted and *de novo* AI-derived hESCs and iPSCs.** (a) Representative flow cytometry for AI-adapted RCiB10 iPSCs quantifying proportional expression of the indicated proteins (blue). Isotype control in grey.  $n = 3$  technical replicates. (b) Representative immunofluorescence analysis of AI-adapted RCiB10 iPSCs for the indicated proteins; DAPI (blue) nuclear staining.  $n = 3$  biological replicates. Scale bar: 50  $\mu\text{m}$ . (c) Alkaline phosphatase staining following CRISPR/Cas9 targeting of *ARGFX* and clonal expansion of AI-cultured hESCs. (d) T7 endonuclease mismatch detection assay following nucleofection of a GFP control plasmid or a plasmid containing the gene encoding a Cas9 enzyme and a gRNA targeting *ARGFX*. T7 endonuclease I enzyme treated (+) or untreated (-) DNA is noted. Genomic ladder (L). (e, f) Representative G-banding patterns of AI-adapted iPSCs and hESCs.  $n = 3$  biological replicates. (g) Representative karyotype analysis following whole-genome sequencing of AI-adapted hESCs.  $n = 2$  biological and 2 technical replicates. (h) Viability assay for hESCs in AI medium ( $n = 4$  biological and 3 technical replicates) compared to KSR+FGF2 and mTeSR1 media ( $n = 2$  biological and 3 technical replicates). (i) Representative immunofluorescence analysis of AI-derived hESCs for the indicated proteins; DAPI nuclear stain (blue).  $n = 3$  biological replicates. Scale bar: 50  $\mu\text{m}$ . (j) Representative images of iPSC-like colonies (circled) derived from BJ fibroblasts with Sendai viruses driving the exogenous expression of OCT4, SOX2, KLF4 and cMYC (OSKM). Shown in KSR+FGF2 and TeSR-E8 media 12 and 18 days post-induction.  $n = 2$  technical replicates. Scale bar: 300  $\mu\text{m}$  top panels, 100  $\mu\text{m}$  bottom panels. (k) TRA-1-60 staining of iPSC colonies in KSR+FGF2, TeSR-E8 or AI media 18 days post-induction. Scale bars: 100  $\mu\text{m}$ . (l) Alkaline phosphatase staining of AI-derived iPSCs 18 days post-transduction. (m) Representative images of iPSC-like colonies derived following transfection of MRC5 fibroblasts with non-modified OSKM RNAs. Scale bar: 200  $\mu\text{m}$ . (n) Phase contrast representative images of AI-derived iPSC lines maintained on laminin, 33 days post OSKM RNA transfection. Scale bar: left to right: 300  $\mu\text{m}$ , 150  $\mu\text{m}$ , 100  $\mu\text{m}$ . Source data are provided as a Source Data file.

# Supplementary Figure 6

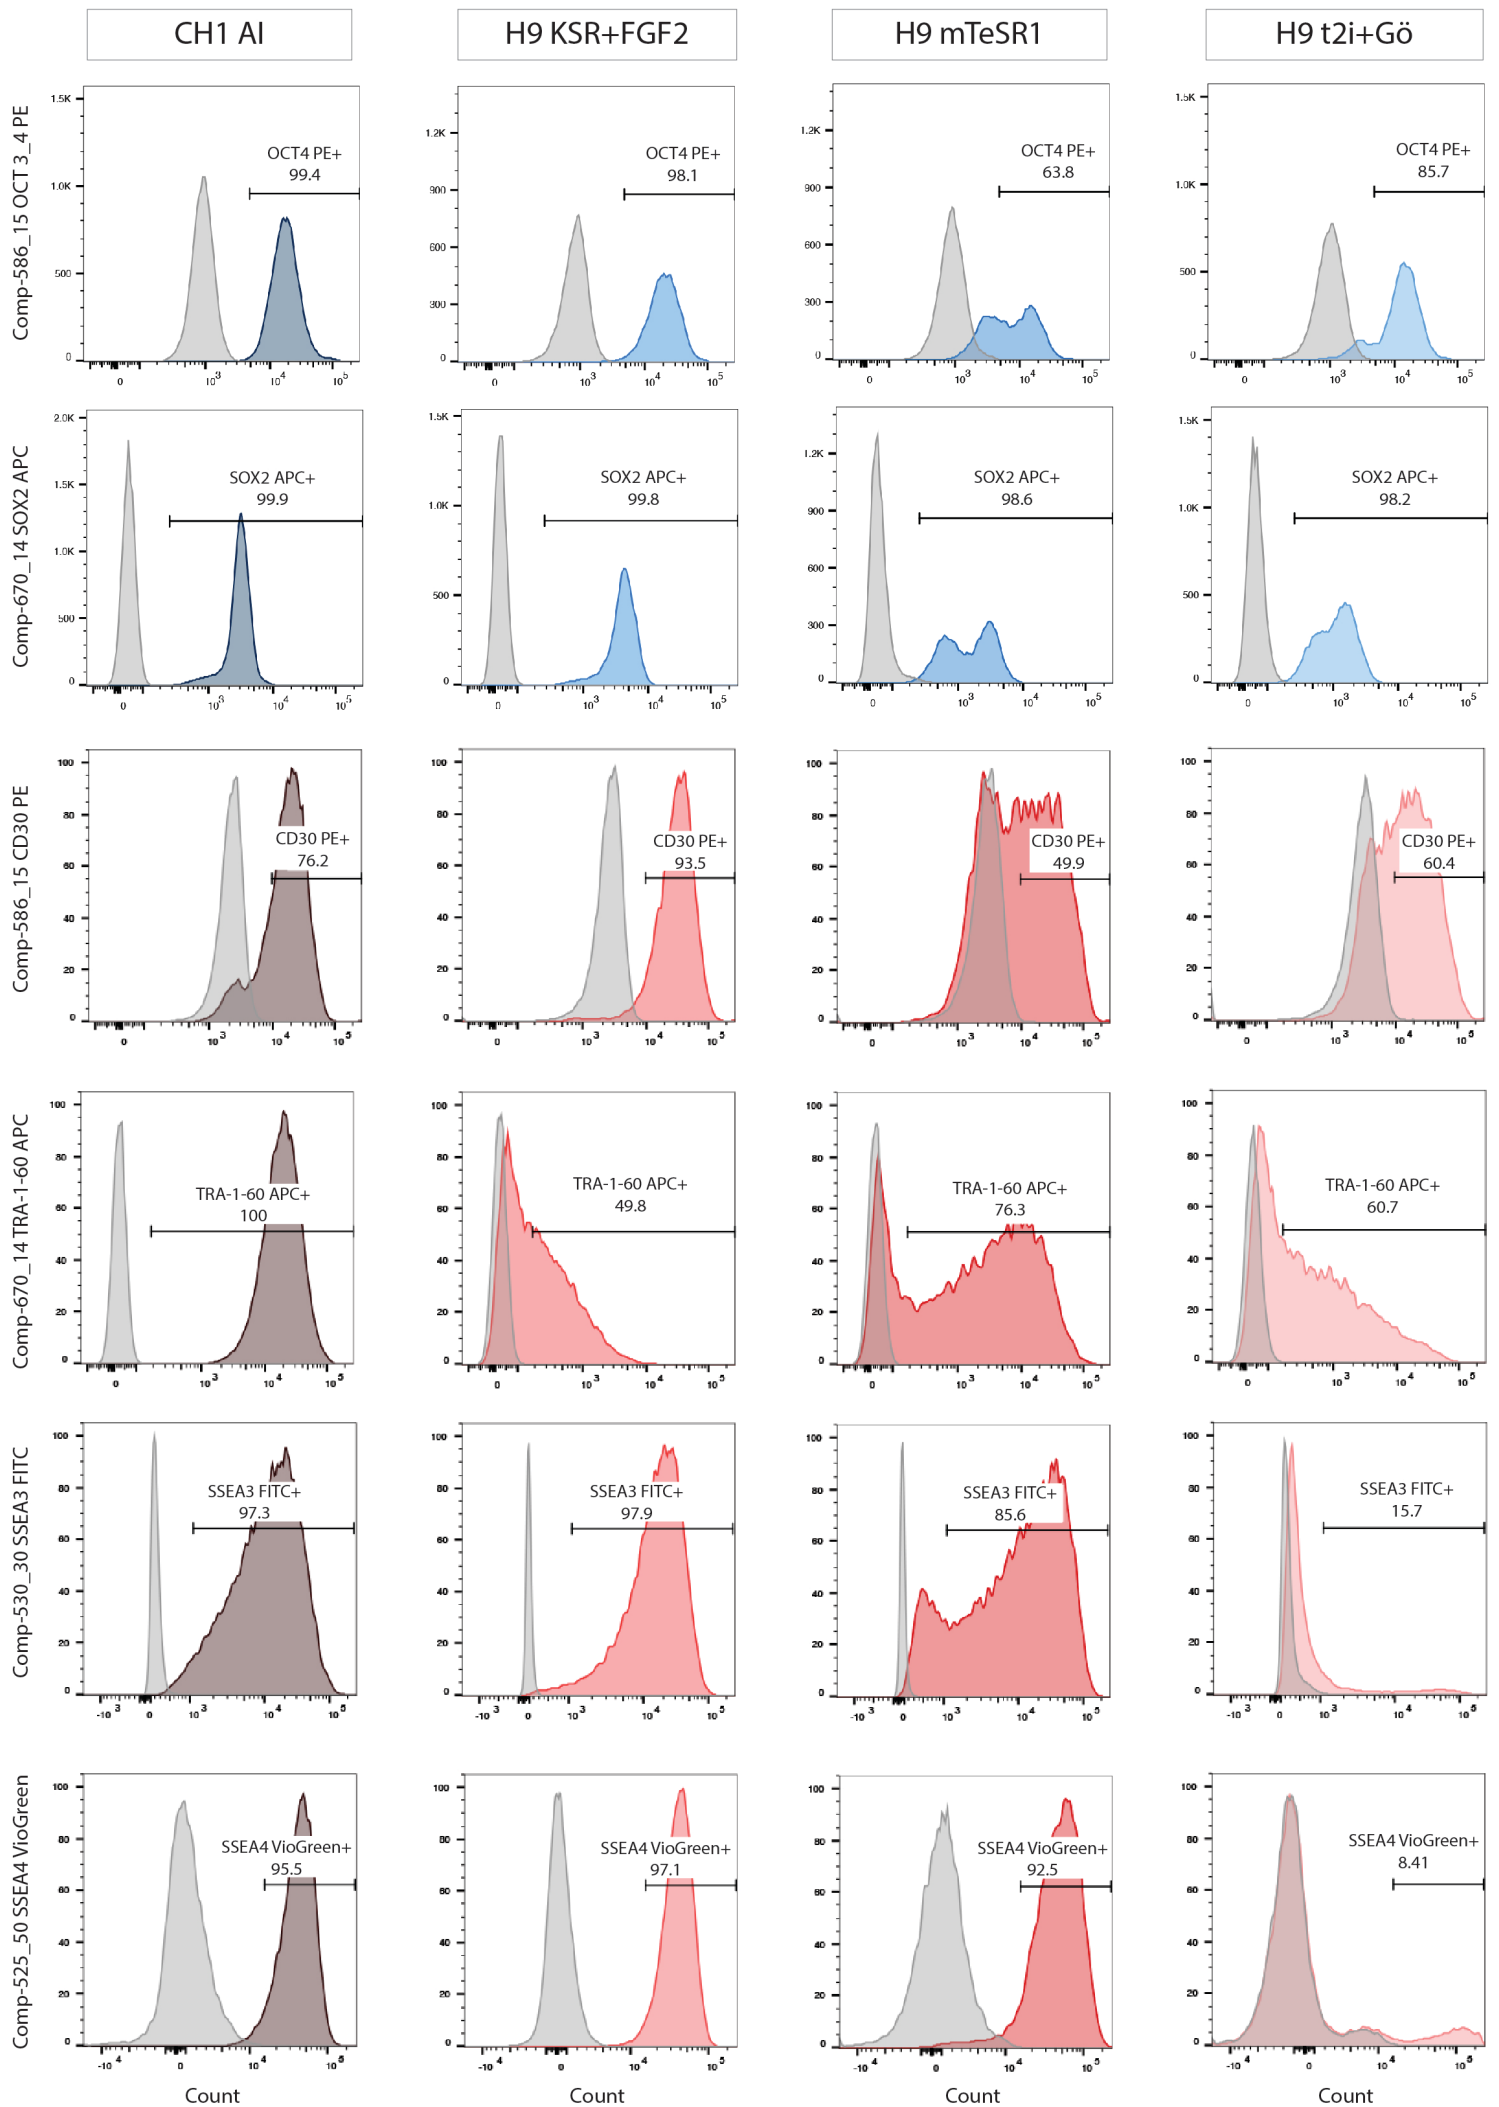

**Supplementary Figure 6: Flow cytometry analysis of hESCs cultured in mTeSR1, KSR+FGF, t2iL+Gö or AI medium.** Representative flow cytometry for H9 hESCs in t2iL+Gö, mTeSR1 and KSR+FGF2 compared to AI-derived CH3 hESCs. The proportion of cells expressing OCT4 and SOX2 (blue), and CD30, TRA-1-60, SSEA4 and SSEA3 (red), was quantified. Isotype control shown in grey.

## Supplementary Figure 7

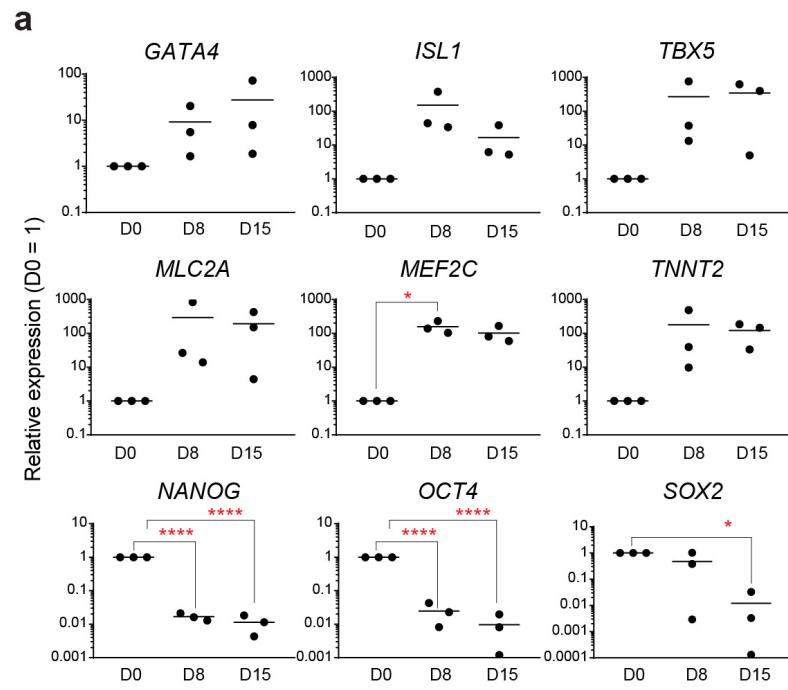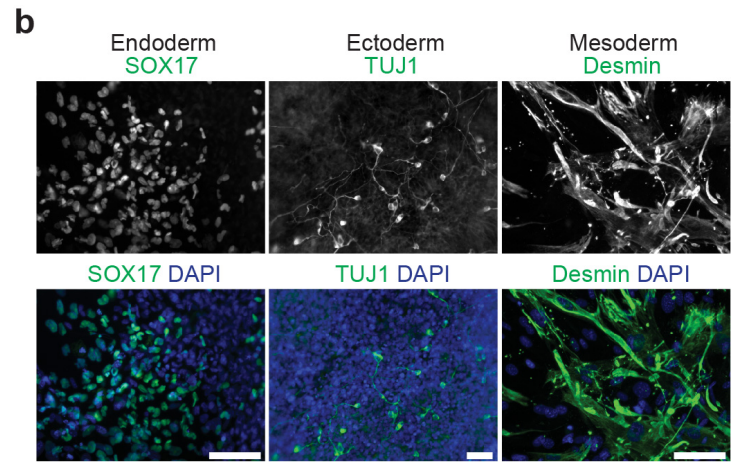

**Supplementary Figure 7: Differentiation potential of cells cultured in AI medium.** (a) qRT-PCR analysis following directed differentiation of AI-adapted hESCs using the STEMdiff cardiomyocyte differentiation kit (StemCell Technologies). Selected genes associated with hESCs (*NANOG*, *OCT4*, *SOX2*), foregut endoderm (*GATA4*, *ISL1*, *TBX5*) or cardiomyocytes (*MLC2A*, *MEF2C*, *TNNT2*). Relative expression as fold difference over undifferentiated hESCs (day 0 expression = 1) and normalized to *PBDG*. Data points and mean  $\pm$  s.e.m. are shown:  $n = 3$  biological and 2 technical replicates. One-way ANOVA; \* $P < 0.05$ ; \*\* $P < 0.01$ ; \*\*\* $P < 0.001$ ; \*\*\*\* $P < 0.0001$ . (b) Representative immunofluorescence images following spontaneous differentiation of AI-derived hESCs into the three germ layers: SOX17 (endoderm), TUJ1 (ectoderm) and DESMIN (mesoderm) in green, DAPI nuclear stain in blue.  $n = 3$  biological and 2 technical replicates. Scale bars: 100  $\mu\text{m}$ . Source data are provided as a Source Data file.

# Supplementary Figure 8

**a**

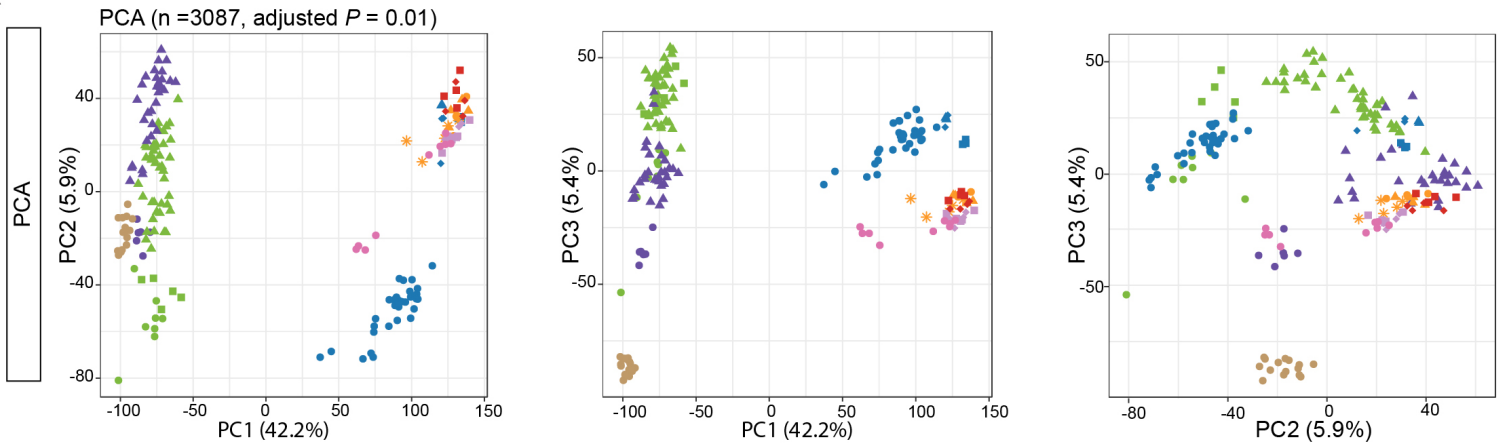

**b**

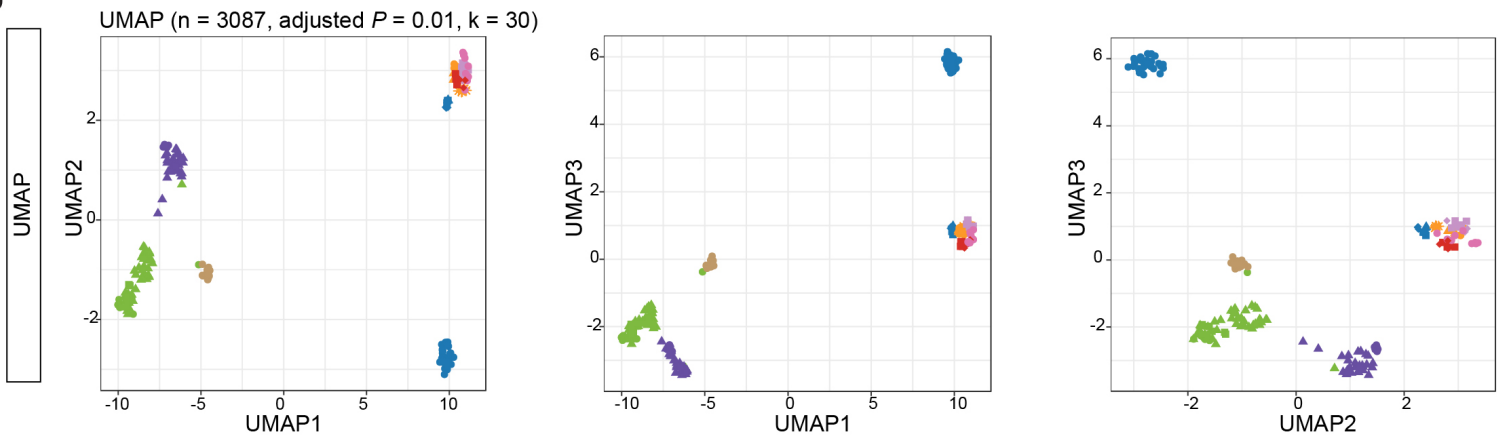

**c**

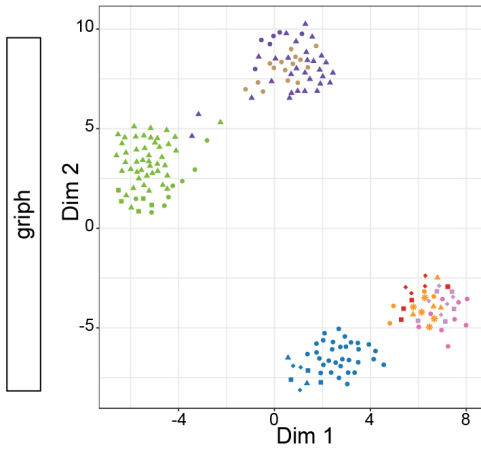

**d**

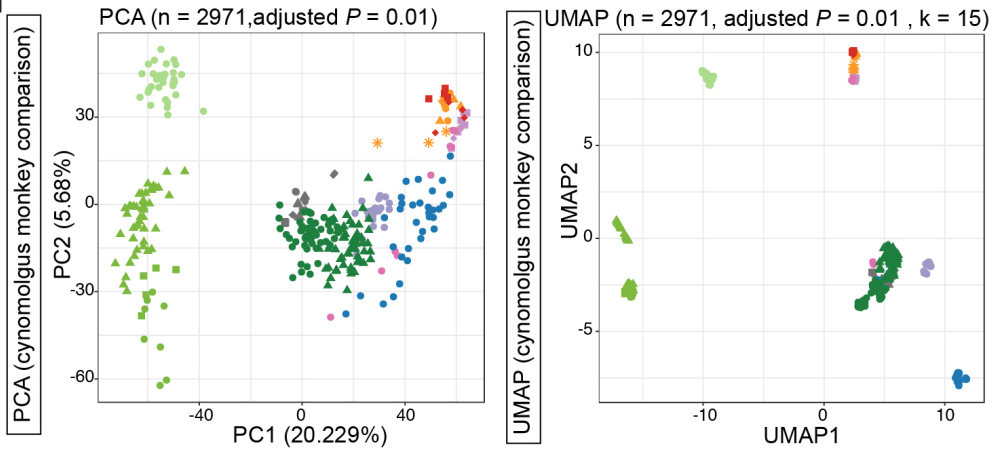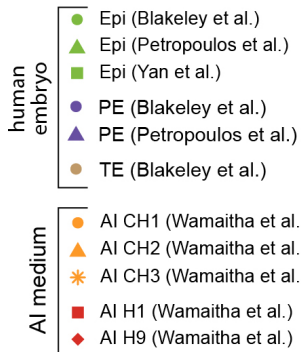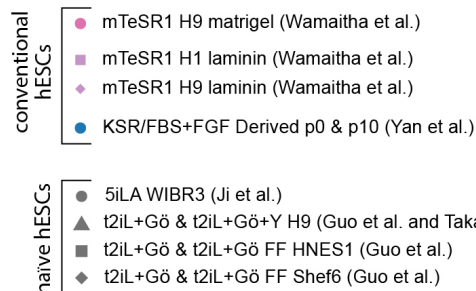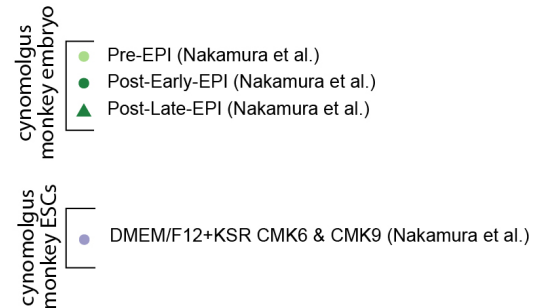



**Supplementary Figure 8: Transcriptome analysis of hESCs and early human embryo cells.**

Analysis of single cell RNA-seq data from AI- or mTeSR1-cultured hESCs or human embryo EPI, PE or TE cells<sup>1,2,3</sup> ( $n = 3087$  most variable genes, adjusted  $P \leq 0.01$ , lowest Kullback-Leibler divergence from 100 runs). A color-coded sample key is provided. **(a)** Principal component analysis (PCA) plot showing the relationships between samples as captured by the first three principal components after removal of batch effects. **(b)** UMAP non-linear dimensionality reduction analysis of the same sample set. The initial number of neighbours was set to  $k = 30$ . **(c)** Clusters detected by graph when applied to RNA-seq data from the human embryo, conventional hESCs, and AI-cultured hESCs. **(d)** PCA and UMAP plots of single cell RNA-seq data from the human embryo and hESCs as above, as well as from hESCs in naïve media<sup>4,5,6,7</sup>, and pre-implantation EPI and early or late postimplantation EPI cells of the cynomolgus monkey embryo<sup>8</sup> ( $n = 2971$  most variable genes, adjusted  $P \leq 0.01$ ).

# Supplementary Figure 9

**a**

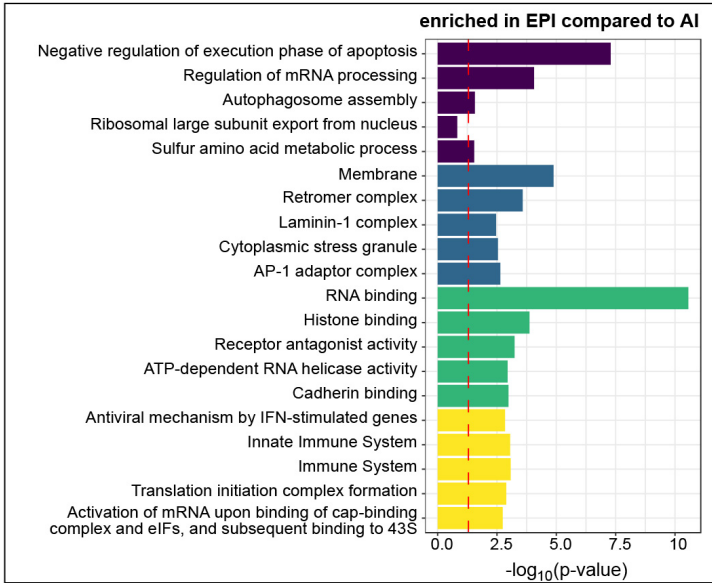

**d**

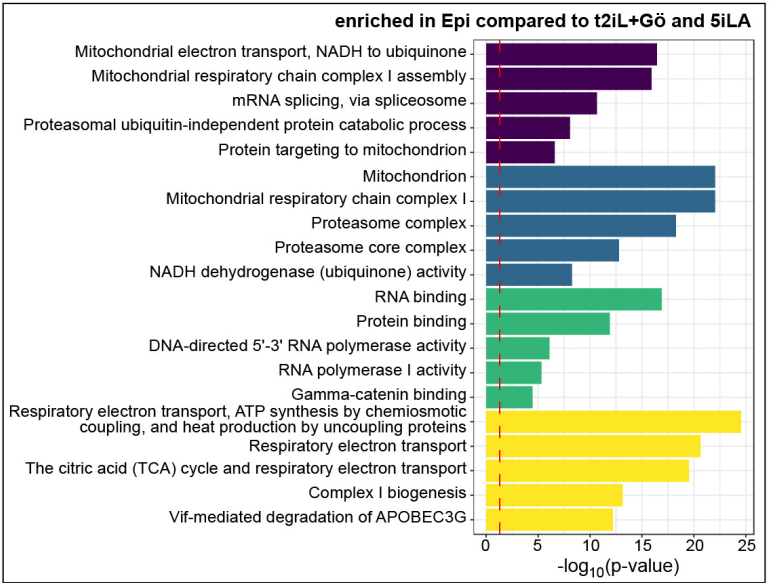

**b**

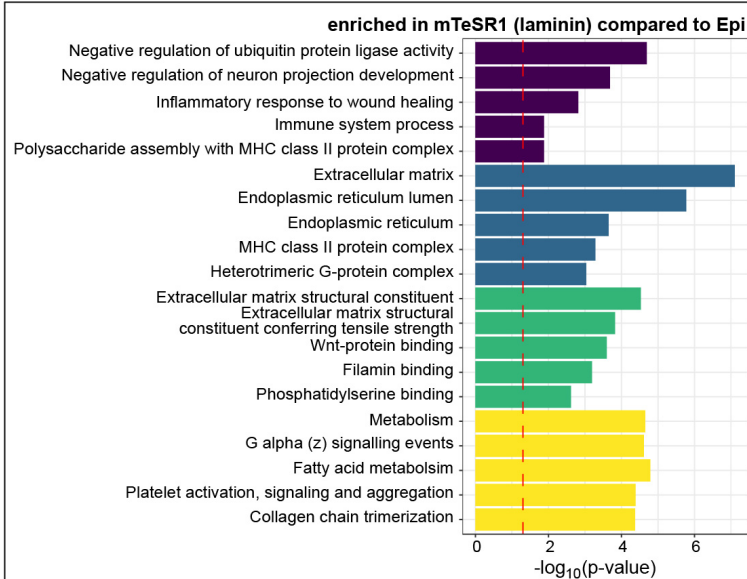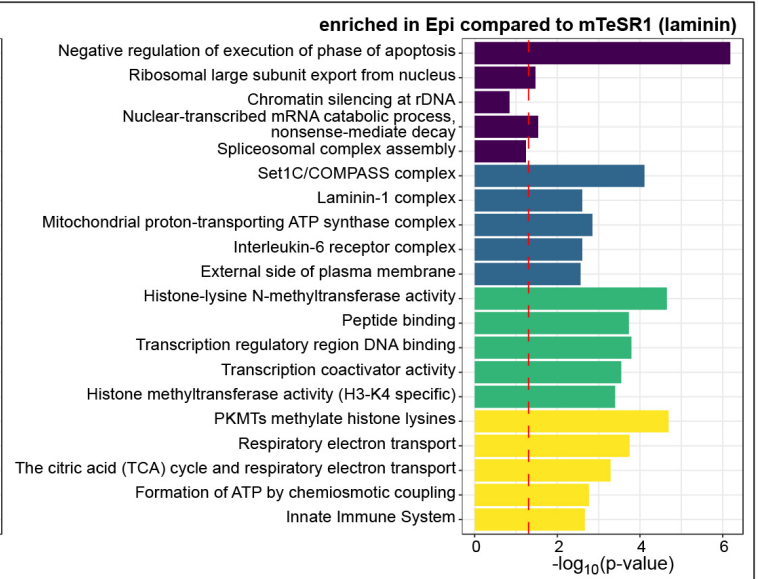

**c**

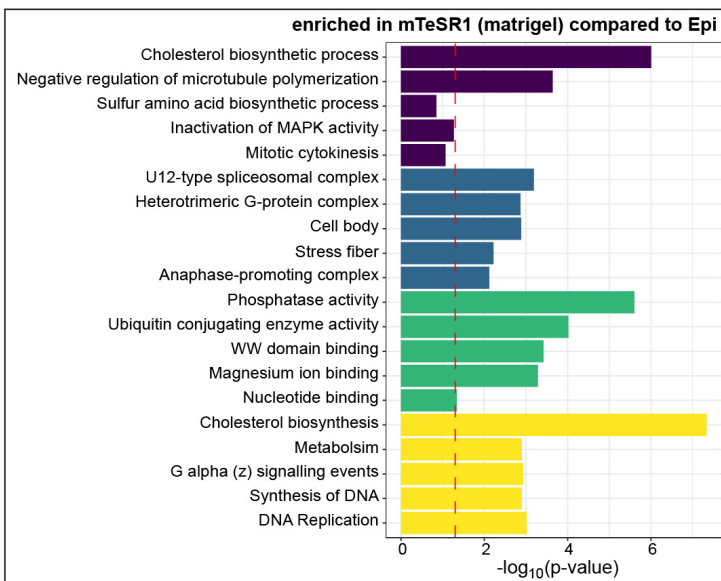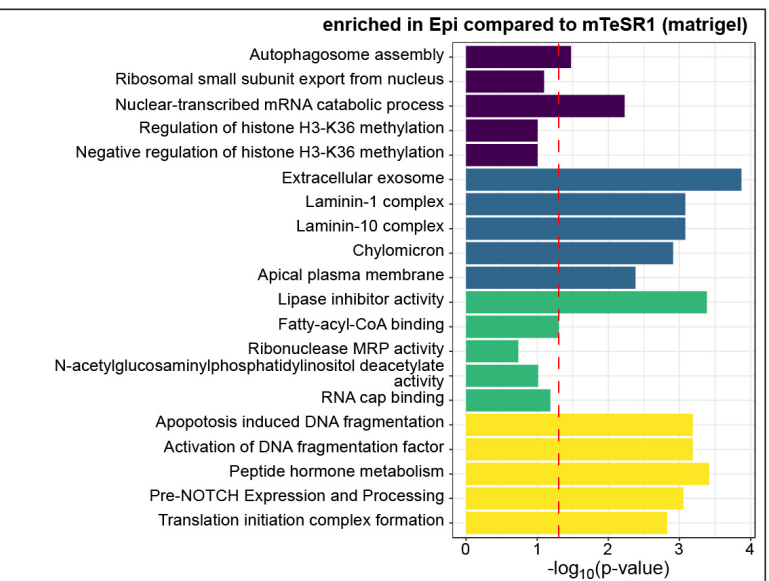

BP CC MF REACTOME

**Supplementary Figure 9: Functional enrichment analysis of differentially expressed genes.**

The most enriched REACTOME pathways or GO terms associated with differentially expressed genes ( $\log_2$  fold change  $\geq 1$ , adjusted  $P \leq 0.001$ ) are shown based on Benjamini-Hochberg corrected p-values (BP: biological process, CC: cellular component, MF: molecular function). Red dashed lines correspond to the significance level  $\alpha = 0.05$ . Comparison of human EPI cells to hESCs cultured in (a) AI medium; (b) t2iL+Gö and 5iLA media; mTeSR1 medium (c) laminin-511 or (d) mTeSR1 medium on Matrigel.

# Supplementary Figure 10

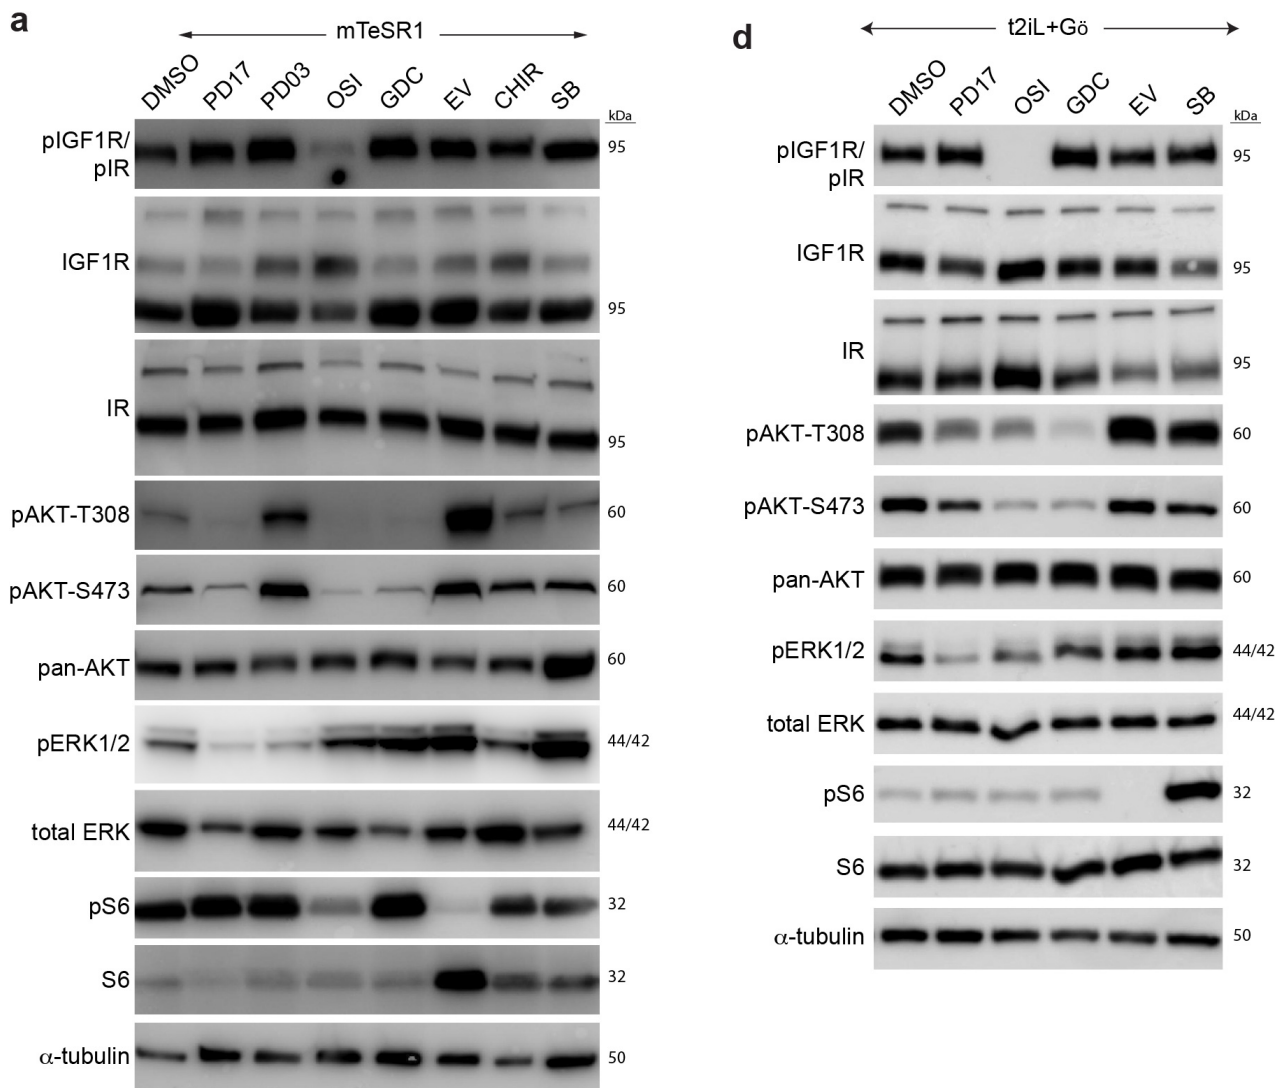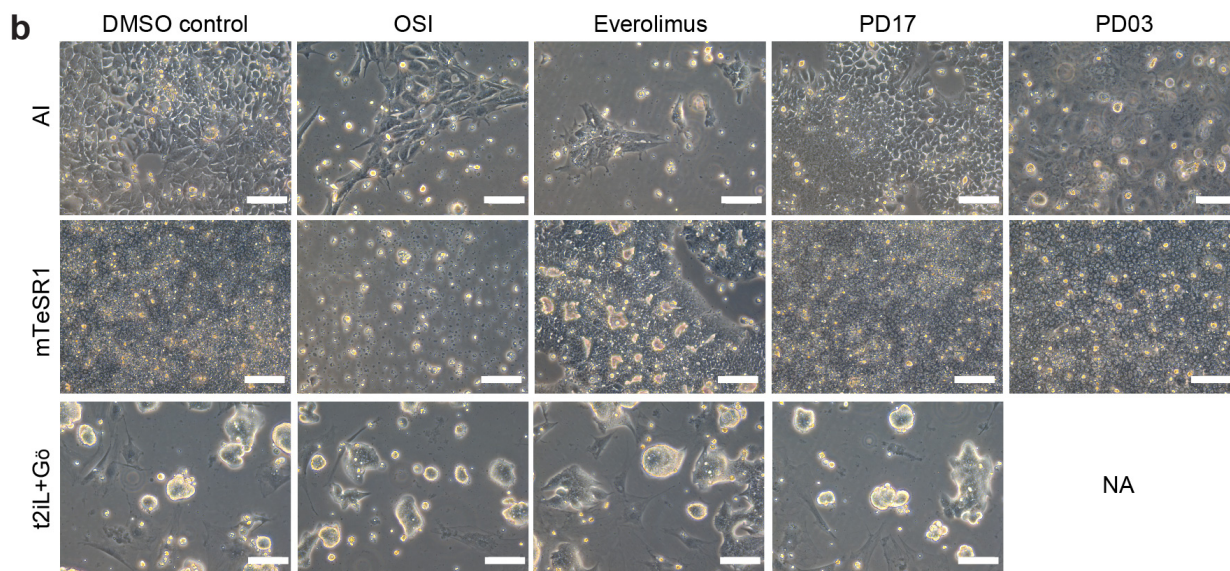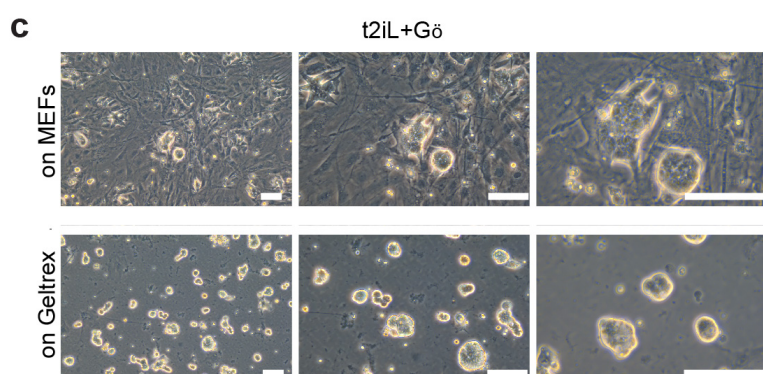

**Supplementary Figure 10: Evaluating signalling pathway dynamics.** (a) Representative western blots for proteins related to PI3K/AKT/mTOR and MAPK/ERK signalling in hESCs cultured in mTeSR1 medium supplemented with DMSO, PD17, PD03, OSI, GDC, EV, CHIR or SB for 24 hours.  $n = 2$  biological and  $n = 3$  technical replicates. (b) Representative phase contrast images of hESCs cultured in AI, mTeSR1 or t2iL+Gö medium with DMSO or with inhibitors for 3 days. Scale bars: 100  $\mu\text{m}$ .  $n = 2$  biological and  $n = 3$  technical replicates. (c) Representative phase contrast images of hESCs cultured in t2iL+Gö on MEFs or on Geltrex substrate. Scale bars: 100  $\mu\text{m}$ . (d) Representative western blots for proteins related to PI3K and MAPK/ERK signalling in hESCs cultured on Geltrex in t2iL+Gö medium supplemented with DMSO, PD17, OSI, GDC, EV or SB for 24 hours.  $n = 2$  biological and  $n = 3$  technical replicates. Full blots are provided in Supplementary Figure 11.

# Supplementary Figure 11

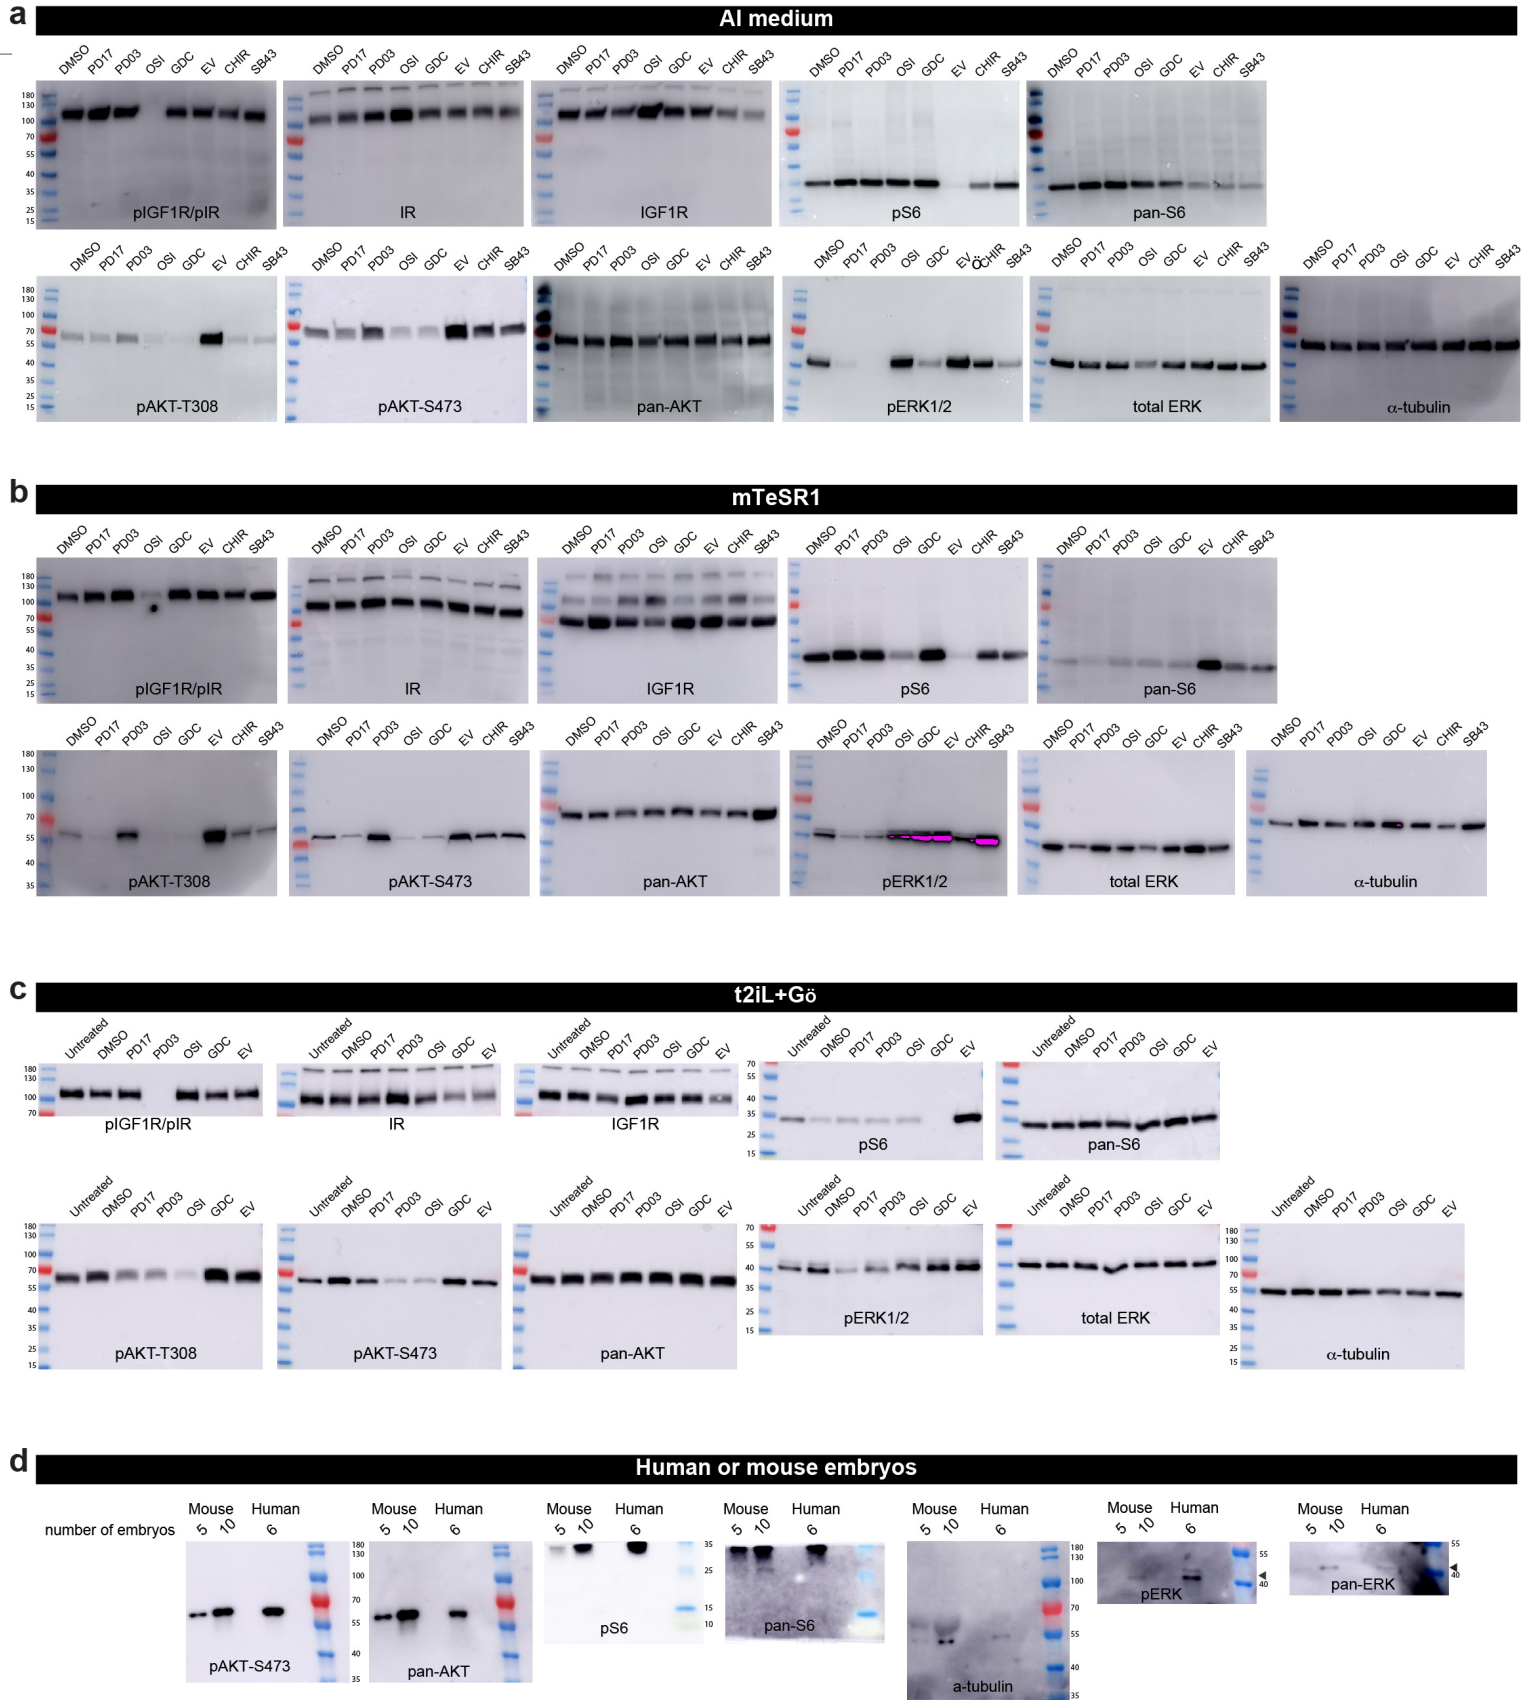

**Supplementary Figure 11: Full-length panels of western blots.** The western blots shown were used in Figures 3 and 4, and Supplementary Figure 10 for hESCs cultured in (a) AI, (b) mTeSR1 or (c) t2iL+Gö media, and (d) human or mouse embryos.

# Supplementary Figure 12

**a**

## Intracellular proteins

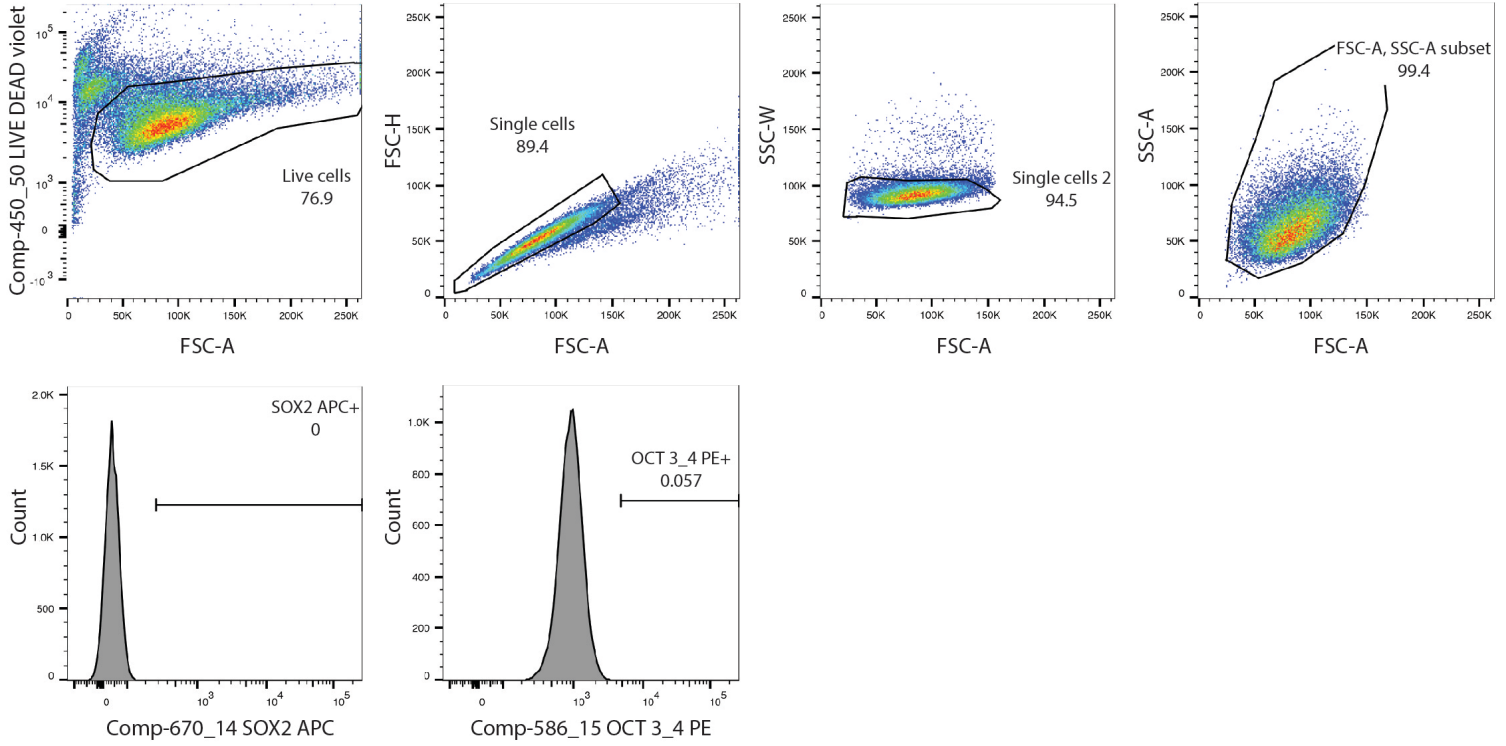

**b**

## Surface marker proteins

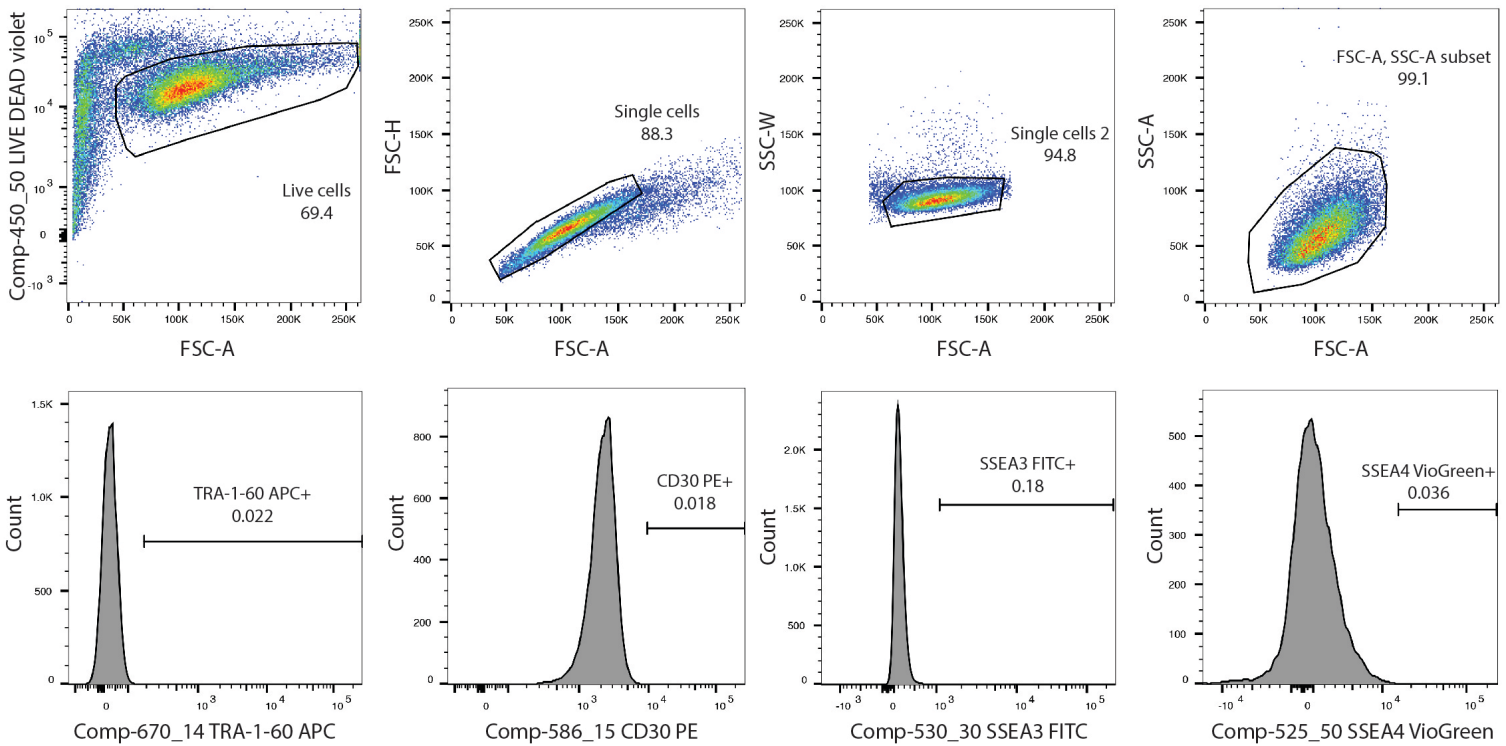



**Supplementary Figure 12: Gating strategy for flow cytometry analysis of hESCs and iPSCs cultured in AI medium.** Representative gating strategy and results for flow cytometry analysis of (a) intracellular and (b) cell surface marker proteins. Live cells were selected using a LIVE/DEAD® Fixable Violet Dead Cell Stain Kit. Cells were gated based on forward and side scatter plot of total events acquired, with doublets excluded. This live single cell population was then used for further expression analysis of surface (TRA1-60, CD30, SSEA-3, SSEA-4) and intracellular (NANOG, OCT-3/4, SOX2) markers.  $n = 3$  technical replicates and 2 biological replicates.

## Supplementary Tables

**Supplementary Table 1: Primary antibodies used for IHC and Western blot**

| Primary Antibody             | Supplier           | Catalogue Number | Application | Species | Dilution      |
|------------------------------|--------------------|------------------|-------------|---------|---------------|
| AFP                          | Dako               | A0008            | IHC         | Rabbit  | 1:500         |
| Alpha-Actin                  | Sigma              | A7811            | IHC         | Mouse   | 1:400         |
| Alpha-tubulin                | Sigma              | T9026            | WB          | Mouse   | 1:1000        |
| Pan Akt                      | Cell Signaling     | 2920             | WB          | Mouse   | 1:1000        |
| Phospho Akt S473             | Cell Signaling     | 13038            | WB          | Rabbit  | 1:1000        |
| Phospho Akt T308             | Cell Signaling     | 4060             | WB          | Rabbit  | 1:1000        |
| cTnT (cardiac troponin)      | ThermoFisher       | MA5-12960        | IHC         | Mouse   | 1:25          |
| CK18                         | Abcam              | ab668            | IHC         | Mouse   | 1:500         |
| CXCR4                        | R&D                | MAB173           | IHC         | Mouse   | 1:500         |
| Desmin                       | Neomarkers         | RB-9014-R7       | IHC         | Rabbit  | 1:50          |
| FOXA2                        | Cell Signaling     | 3143             | IHC         | Rabbit  | 1:500         |
| GATA6                        | Santa Cruz         | SC-9055          | IHC         | Rabbit  | 1:500         |
| KLF17                        | Atlas              | HPA024629        | IHC         | Rabbit  | 1:250         |
| IGF1R                        | Cell Signaling     | 3027             | WB          | Rabbit  | 1:1000        |
| IR                           | Cell Signaling     | 3020             | WB          | Mouse   | 1:1000        |
| Phospho IGF1R/IR             | Cell Signaling     | 3024             | WB          | Rabbit  | 1:1000        |
| Phospho p44/42 MAPK (Erk1/2) | Cell Signaling     | 9107             | WB          | Mouse   | 1:1000        |
| Total p44/42 MAPK (Erk1/2)   | Cell Signaling     | 4370             | WB          | Rabbit  | 1:1000        |
| NANOG                        | Abcam              | ab21624          | IHC         | Rabbit  | 1:500         |
| NANOG                        | Cell Signaling     | 4903P            | IHC         | Rabbit  |               |
| NANOG                        | R&D                | AF1997           | IHC         | Goat    | 1:500         |
| NESTIN                       | Proteintech        | 66259            | IHC         | Mouse   | 1:500         |
| NKX2.5                       | Santa Cruz         | SC-8697          | IHC         | Goat    | 1:200         |
| OCT4                         | Cell Signaling     | 2750S            | IHC         | Rabbit  |               |
| OCT4                         | Santa Cruz Biotech | SC-5279          | IHC         | Mouse   | 1:500         |
| OTX2                         | R&D                | AF1979           | IHC         | Goat    | 1:100         |
| PAX6                         | Covance            | PRB-278P         | IHC         | Rabbit  | 1:250         |
| Pan S6                       | Cell Signaling     | 2317             | WB          | Mouse   | 1:1000        |
| Phospho S6                   | Cell Signaling     | 2211             | IHC/WB      | Rabbit  | 1:1000 / 1:25 |
| SOX17                        | R&D                | AF1924           | IHC         | Goat    | 1:500         |
| SSEA4                        | DSHB               | MC-813-70        | IHC         | Mouse   | 1:100         |

|          |                   |         |     |           |               |
|----------|-------------------|---------|-----|-----------|---------------|
| SSEA4    | Life Technologies | MA1-021 | IHC | Mouse     |               |
| TRA-1-60 | Millipore         | MAB     | IHC | Mouse IgM | 1:100         |
| TRA-1-81 | Millipore         | MAB4381 | IHC | Mouse IgM | 1:500         |
| TRA-1-81 | BD Biosciences    | 560072  | IHC | Mouse IgM |               |
| Tuj1     | Sigma             | T2200   | IHC | Rabbit    | 1:500 / 1:250 |

**Supplementary Table 2: Secondary antibodies used for IHC and Western blot**

| Secondary Antibody               | Supplier       | Catalogue No.                                | Application | Species | Dilution |
|----------------------------------|----------------|----------------------------------------------|-------------|---------|----------|
| Alexa Fluor anti-mouse IgG       | Invitrogen     | A21202 (488)<br>A21203 (594)<br>A31571 (647) | IHC         | Donkey  | 1:300    |
| Alexa Fluor anti-rabbit IgG      | Invitrogen     | A21206 (488)<br>A21207 (594)<br>A31573 (647) | IHC         | Donkey  | 1:300    |
| Alexa Fluor anti-goat IgG        | Invitrogen     | A11055 (488)<br>A11058 (594)<br>A21447 (647) | IHC         | Donkey  | 1:300    |
| Goat IgG (H+L), HRP conjugated   | Santa Cruz     | SC-2020                                      | WB          | Goat    | 1:20000  |
| Mouse IgG (H+L), HRP conjugated  | Cell Signaling | 7076                                         | WB          | Mouse   | 1:20000  |
| Rabbit IgG (H+L), HRP conjugated | Cell Signaling | 7074                                         | WB          | Rabbit  | 1:20000  |

**Supplementary Table 3: Conjugated antibodies used for flow cytometry**

| Primary Antibody (clone)         | Supplier         | Catalogue Number | Fluorochrome    | Species |
|----------------------------------|------------------|------------------|-----------------|---------|
| CD30 (Ber-H8)                    | BD Biosciences   | 550041           | PE              | Mouse   |
| CD30, isotype control (MOPC-21)  | BD Biosciences   | 555749           | PE              | Mouse   |
| NANOG (N31-355)                  | BD Biosciences   | 560791           | Alexa Fluor 488 | Mouse   |
| NANOG, isotype control (MOPC-21) | BD Biosciences   | 557702           | Alexa Fluor 488 | Mouse   |
| OCT4 (O50-808)                   | BD Biosciences   | 561556           | PE              | Mouse   |
| OCT4, isotype control (MOPC-21)  | BD Biosciences   | 554680           | PE              | Mouse   |
| SOX2 (14A6A34)                   | Biologend        | 656108           | Alexa Fluor 647 | Mouse   |
| SOX2, isotype control (MOPC-21)  | Biologend        | 400136           | Alexa Fluor 647 | Mouse   |
| SSEA3 (MC-631)                   | Biologend        | 330306           | Alexa Fluor 488 | Rat IgM |
| SSEA3, isotype control (RTK2118) | Biologend        | 400811           | Alexa Fluor 488 | Rat IgM |
| SSEA4 (REA101)                   | Miltenyi Biotech | 130-098-341      | VioGreen        | Human   |

|                                   |                  |             |                 |       |
|-----------------------------------|------------------|-------------|-----------------|-------|
| SSEA4, isotype control (REA293)   | Miltenyi Biotech | 130-104-608 | VioGreen        | Human |
| TRA-1-60 (TRA-1-60-R)             | Biolegend        | 330605      | Alexa Fluor 647 | Mouse |
| TRA-1-60, isotype control (MM-30) | Biolegend        | 401618      | Alexa Fluor 647 | Mouse |

**Supplementary Table 4: qRT-PCR primer pairs**

| <b>Name</b>  | <b>Forward Primer</b> | <b>Reverse Primer</b> |
|--------------|-----------------------|-----------------------|
| <i>GAPDH</i> | GATGACATCAAGAAGGTGGTG | GTCTACATGGCAACTGTGAGG |
| <i>GATA4</i> | TCCCTCTTCCCTCCTCAAAT  | TCAGCGTGTAAGGCATCTG   |
| <i>ISL1</i>  | TGCTTTTCAGCAACTGGTCA  | TGAATGTTCCCTCATGCCTCA |
| <i>MEF2C</i> | ACGCGGATTATGGATGAACG  | TGGCATACTGGAACAGCTTG  |
| <i>MESP1</i> | ACCGTCCCGCTCCTT       | GTCCCTTGCACTTGGGCT    |
| <i>MLC2A</i> | AACTTGCTGCCTGGGTCAG   | AAGCCATCCTGAGTGCCTTC  |
| <i>NANOG</i> | CATGAGTGTGGATCCAGCTTG | CCTGAATAAGCAGATCCATGG |
| <i>OCT4</i>  | AGTGAGAGGCAACCTGGAGA  | ACACTCGGACCACATCCTTC  |
| <i>OTX2</i>  | TGTGAAGACCTGTAGAACCTC | GGTTTGTAGGCCCTCTAAG   |
| <i>PBDG1</i> | ATTACCCCGGGAGACTGAAC  | GGCTGTTGCTTGGACTTCTC  |
| <i>REX1</i>  | GGAATGTGGGAAAGCGTTCGT | CCGTGTGGATGCGCACGT    |
| <i>SOX2</i>  | TGGACAGTTACGCGCACAT   | CGAGTAGGACATGCTGTAGGT |
| <i>TBX5</i>  | GCTGGAAGGCGGATGTTT    | GATCGTCGGCAGGTACAATG  |
| <i>TNNT2</i> | TCCAGAAGACAGAGCGGAAA  | CTTCATTCAGGTGGTCAATGG |

### Supplementary References

1. Blakeley, P. *et al.* Defining the three cell lineages of the human blastocyst by single-cell RNA-seq. *Development* **142**, 3613–3613 (2015).
2. Yan, L. *et al.* Single-cell RNA-Seq profiling of human preimplantation embryos and embryonic stem cells. *Nat. Struct. Mol. Biol.* **20**, 1131–1139 (2013).
3. Petropoulos, S. *et al.* Single-Cell RNA-Seq Reveals Lineage and X Chromosome Dynamics in Human Preimplantation Embryos. *Cell* **165**, 1012–1026 (2016).
4. Takashima, Y. *et al.* Resetting Transcription Factor Control Circuitry toward Ground-State Pluripotency in Human. *Cell* **158**, 1254–1269 (2014).
5. Ji, X. *et al.* 3D Chromosome Regulatory Landscape of Human Pluripotent Cells. *Cell Stem Cell* **18**, 262–75 (2016).
6. Guo, G. *et al.* Naive Pluripotent Stem Cells Derived Directly from Isolated Cells of the Human Inner Cell Mass. *Stem cell reports* **6**, 437–446 (2016).
7. Chan, Y.-S. *et al.* Induction of a Human Pluripotent State with Distinct Regulatory Circuitry that Resembles Preimplantation Epiblast. *Cell Stem Cell* **13**, 663–675 (2013).
8. Nakamura, T. *et al.* A developmental coordinate of pluripotency among mice, monkeys and humans. *Nature* **537**, 57–62 (2016).
